# 1 **Comparative population genomics of three related *Populus* species**

2

3 Jing Wang<sup>1</sup>, Nathaniel R. Street<sup>2</sup>, Douglas G. Scofield<sup>1,3,4</sup>, Pär K. Ingvarsson<sup>1\*</sup>

4

5 <sup>1</sup> Department of Ecology and Environmental Science, Umeå University, Umeå,  
6 Sweden

7 <sup>2</sup> Umeå Plant Science Centre, Department of Plant Physiology, Umeå University,  
8 Umeå, Sweden

9 <sup>3</sup> Department of Ecology and Genetics: Evolutionary Biology, Uppsala University,  
10 Uppsala, Sweden

11 <sup>4</sup> Uppsala Multidisciplinary Center for Advanced Computational Science, Uppsala  
12 University, Uppsala, Sweden

13

14 \* Corresponding author

15 Email: par.ingvarsson@umu.se

16

17

18

19

20

21

22

23

24

## 25    **Abstract**

26    A central aim of evolutionary genomics is to identify the relative roles that various  
 27    evolutionary forces have played in generating and shaping genetic variation within  
 28    and among species. Here we used whole-genome re-sequencing data from three  
 29    related *Populus* species to characterize and compare genome-wide patterns of  
 30    nucleotide polymorphism, site frequency spectrum, population-scaled recombination  
 31    rate and linkage disequilibrium. Our analyses revealed that *P. tremuloides* has the  
 32    highest level of genome-wide variation, skewed allele frequencies and population-  
 33    scaled recombination rates, whereas *P. trichocarpa* harbors the lowest. Consistent  
 34    with this, linkage disequilibrium decay was fastest in *P. tremuloides* and slowest in *P.*  
 35    *trichocarpa*. Pervasive natural selection has been proven to be the primary force  
 36    creating significant positive correlations between neutral polymorphism and  
 37    recombination rate in all three species. Disparate effective population sizes and  
 38    recombination rates among species, on the other hand, drive the distinct magnitudes  
 39    and signatures of linked selection and consequent heterogeneous patterns of genomic  
 40    variation among them. We find that purifying selection against slightly deleterious  
 41    non-synonymous mutations is more effective in regions experiencing high  
 42    recombination, which may provide one explanation for a partially positive association  
 43    between recombination rate and gene density in these species. Moreover, distinct  
 44    signatures of linked selection dependent on gene density are found between genic and  
 45    intergenic regions within each species. To our knowledge, the present work is the first  
 46    comparative population genomic study among forest tree species and represents an  
 47    important step toward dissecting how the interactions of various evolutionary forces  
 48    have shaped genomic variation within and among these ecologically and  
 49    economically important tree species.

## 50 **Author Summary**

51 A fundamental goal of population genetics is to understand how various evolutionary  
 52 forces shape the heterogeneity of genomic variation within and among species. Here,  
 53 we characterize and compare genome-wide patterns of nucleotide diversity, site  
 54 frequency spectra, population-scaled recombination rates and linkage disequilibrium  
 55 among three related *Populus* species: *Populus tremula*, *P. tremuloides* and *P.*  
 56 *trichocarpa*. Pervasive natural selection, mediated by the local recombination  
 57 environments, is supposed to be the primary force shaping heterogeneous patterns of  
 58 neutral polymorphism throughout the genome. The disparate magnitudes and  
 59 signatures of linked selection among the three species, however, likely result from  
 60 either different effective population sizes and/or differences in recombination rates  
 61 among them. Moreover, we find distinct patterns of selection between genic and  
 62 intergenic regions in all three species, indicating these two types of sites may have  
 63 undergone independent evolutionary responses to selection in *Populus*. To our  
 64 knowledge, the present work provides the first phylogenetic comparative study of  
 65 genome-wide patterns of variation between closely related forest tree species. This  
 66 information will also improve our ability to understand how various evolutionary  
 67 forces have interacted to influence genome evolution among related species.

68

69

70

71

72

73

74

## 75    **Introduction**

76    A major goal in evolutionary genetics is to understand how genomic variation is  
77    established, maintained and diverge within and between species [1, 2]. Various  
78    evolutionary forces are known to have substantial impacts in shaping genetic variation  
79    and linkage disequilibrium throughout the genome [3]. Under the neutral theory,  
80    genetic variation is the manifestation of the balance between mutation and genetic  
81    drift [4]. Demographic fluctuations, such as population expansion and/or bottlenecks,  
82    can cause patterns of genome-wide variation to deviate from standard neutral model  
83    in various ways [5]. Natural selection, via positive selection favoring beneficial  
84    mutations (genetic hitchhiking) and/or negative selection against deleterious  
85    mutations (background selection), plays an important role in sculpting the landscape  
86    of polymorphism across the genome [2, 6-8]. The signature and magnitude of  
87    apparent selection at linked sites depends heavily on the local environment of  
88    recombination [9, 10]. Linked selection is expected to remove more neutral  
89    polymorphism in low-recombination regions compared to high-recombination regions  
90    [10-12]. In addition to indirectly affecting genetic variation via linked selection, the  
91    rate of recombination can also shape the landscape of genomic features, such as base  
92    composition and gene density [13, 14]. However, there remains much to be learned  
93    about how these various evolutionary forces have shaped the heterogeneous patterns  
94    of genomic polymorphism within and between species [2, 6, 15]. With the advance of  
95    next-generation sequencing technology, sufficient genome-wide data among multiple  
96    related species are becoming available [16, 17]. Phylogenetic comparative approaches  
97    using these data will place us in a stronger position to understand the relative  
98    importance of mutation, genetic drift, natural selection and recombination in  
99    determining patterns of genome evolution [18, 19].

Thus far, genome-wide comparative studies have largely dealt with experimental model species, mammals, and cultivated plants of either agricultural or horticultural interest [19-21]. Forest trees, as a group, are characterized by extensive geographical distributions and are of high ecological and economic value [22]. Most forest trees have largely persisted in an undomesticated state and, until quite recently, without anthropogenic influence [22]. Accordingly, in contrast to crop and livestock lineages that have been through strong domestication bottlenecks, most extant populations of forest trees harbor a wealth of genetic variation and they may be excellent model systems for dissecting the dominant evolutionary forces that sculpt patterns of variation throughout the genome [22, 23]. Among forest tree species, the genus *Populus* represents a particularly attractive choice because of its wide geographic distribution, important ecological role in a wide variety of habitats, multiple economic uses in wood and energy products, and relatively small genome size [24, 25]. Here, we studied three *Populus* species which differ in their morphology, geographic distribution, population size and phylogenetic relationship (S1 Fig) [26, 27]. *P. tremula* and *P. tremuloides* (collectively ‘aspens’) have wide native ranges across Eurasia and North America respectively, and are closely related, belonging to the same section of the genus *Populus* (section *Populus*) [27]. In contrast, *P. trichocarpa* belongs to a different section of the genus (section *Tacamahaca*) that is reproductively isolated from members of the section *Populus* [27]. The distribution of *P. trichocarpa* is restricted to western North America and its range is considerably smaller than the two aspen species [28]. Importantly, *P. trichocarpa* also represents the first tree species to have its genome sequenced [29] and the genome sequence and annotation have undergone continual improvement [<http://phytozome.jgi.doe.gov>]. This enables us to provide important context for our genome comparisons. The

125 phylogenetic relationship of the three species ((*P. tremula*–*P.tremuloides*) *P.*  
126 *trichocarpa*) is well established by both chloroplast and nuclear DNA sequences [26,  
127 30].

128 In this study, we used novel and existing Illumina short read ( $2 \times 100$  bp)  
129 datasets to characterize, compare and contrast genome-wide patterns of nucleotide  
130 diversity, recombination rate, and linkage disequilibrium, and to infer contextual  
131 patterns of selection throughout the genomes of all three species.

132

## 133 **Results**

134 We generated whole-genome sequencing data of 24 genomes of *P. tremula* and 22  
135 genomes of *P. tremuloides* (S1 Table) with all samples sequenced to relatively high  
136 depth (24.2×–69.2×; S2 Table). We also downloaded 24 genomes from already  
137 published data of *P. trichocarpa* [31]. After adapter removal and quality trimming,  
138 949.2 Gb of high quality sequence data remained (S2 Table, S2 Fig). Reads from the  
139 three species were mapped to the *P. trichocarpa* reference genome [29] using BWA-  
140 MEM [32], with the mean mapping rate being 89.8% for individuals of *P. tremula*,  
141 91.1% for individuals of *P. tremuloides*, and 95.2% for individuals of *P. trichocarpa*  
142 (S2 Table). On average, the genome-wide coverage of uniquely mapped reads was  
143 more than 20× for each species (S2 Table). After excluding sites with extreme  
144 coverage, low mapping quality, or those overlapping with annotated repetitive  
145 elements separately in each species (see Materials and Methods), 42.8% of collinear  
146 genomic sequences remained for downstream analyses. Among all retained genomic  
147 regions, 54.9% were located within gene boundaries, which covers 70.1% of all genic  
148 regions predicted from *P. trichocarpa* assembly, and the remainder (45.1%) was  
149 located in intergenic regions.

150

# 151 **Negligible population substructure in samples of all three species**

152 Given the great dispersal capabilities of pollen and seed in *Populus* [24, 25],  
 153 population genetic structure appears to be generally weak in most *Populus* species  
 154 [31, 33]. In order to ascertain the population structure within and between species, we  
 155 used a model-based clustering algorithm, implemented in ADMIXTURE [34], to  
 156 cluster sampled individuals using only 4-fold synonymous single nucleotide  
 157 polymorphisms (SNPs) with minor allele frequency greater than 10%. When we  
 158 analyzed population structure between species, we found the model exhibits the  
 159 lowest cross-validation error when  $K=3$  (S3b Fig), which clearly subdivides the three  
 160 species into three distinct clusters (S3a Fig). When we analyzed local population  
 161 structure within each species,  $K=1$  minimized the cross-validation error in all species,  
 162 implying that extremely weak population structure in the samples of the three *Populus*  
 163 species (S3c-e Fig). Therefore, intra-species population structure likely play a  
 164 negligible role in our comparative population genetic analyses among the three  
 165 species.

166

# 167 **Patterns of divergence among the three *Populus* species**

168 We measured pairwise nucleotide divergence ( $d_{xy}$ ) among pairs of the three species  
 169 across the genome in non-overlapping 100 kilobase pairs (Kbp) windows. Between  
 170 either of the two aspen species and *P. trichocarpa*,  $d_{xy}$  was significantly higher than  
 171 between the two aspen species (Wilcoxon rank sum test,  $P$ -value<0.001) (S4 Fig). We  
 172 found extremely consistent patterns of divergence between the two aspen species and  
 173 *P. trichocarpa* (Spearman's  $\rho = 0.994$ ,  $P$ -value<0.001) (S5a Fig), reflecting the  
 174 historical divergence of the common ancestor of two aspen species from *P.*

175 *trichocarpa* and the relatively recent divergence of the two aspen species. In addition,  
 176 we found that the divergence was significantly correlated between the evolutionarily  
 177 independent lineages (*P. tremula*-*P. tremuloides*) vs. (aspens-*P. trichocarpa*) (S5b,c  
 178 Fig), suggesting that patterns of genome-wide variation of mutation rates and/or  
 179 selective constraints are relatively conserved across these three *Populus* species.

180

# **181 Polymorphism varies, but is highly correlated, between species**

182 Fig 1 shows genome-wide estimates of nucleotide diversity among all three species  
 183 over non-overlapping 100 Kbp windows. We also performed the analyses using 1  
 184 megabase pair (Mbp) windows, with the results being nearly identical (S6a Fig). We  
 185 found that both aspen species harbor substantial levels of nucleotide diversity  
 186 ( $\Theta_{\pi}=0.0133$  in *P. tremula*;  $\Theta_{\pi}=0.0144$  in *P. tremuloides*), approximately two-fold  
 187 higher than the diversity in *P. trichocarpa* ( $\Theta_{\pi}=0.0059$ ) (Table 1; Fig 1; S6a Fig). The  
 188 overall nucleotide diversity we observe in *P. trichocarpa* was a slightly higher than  
 189 the value reported in [31]. This is likely due to differences in the methods used  
 190 between the two studies. In this study, we utilized the full information of the filtered  
 191 data and estimated the population genetic statistics directly from genotype  
 192 likelihoods, which takes statistical uncertainty of SNP and genotype calling into  
 193 account and should give more accurate estimates [35, 36]. In accordance with the  
 194 highly consistent genome-wide distribution of  $\Theta_{\pi}$  among the three *Populus* species  
 195 (Fig 1), we observed a significantly positive correlation of  $\Theta_{\pi}$  between each pair of  
 196 species across the whole genome (Fig 2a). Such strong correlations of polymorphism  
 197 suggest that mutation rates and/or selective constraints are highly conserved among  
 198 the species despite the clades represented by genetic sections *Populus* and  
 199 *Tacamahaca* having diverged for ~4.5 million years [37]. Not surprisingly, we found



200 higher correlation of  $\Theta_{\pi}$  between *P. tremula* and *P. tremuloides* (Spearman's  
201  $\rho=0.829$ ,  $P$ -value<0.001, Fig 2a), which both belong to section *Populus*, compared to  
202 the correlation between the two aspen species and *P. trichocarpa*, which is likely due  
203 to the higher levels of shared ancestral polymorphism between the aspens [26].

204

205 **Table 1. Diversity statistics (median and central 95% range) for various genomic**  
206 **contexts over 100 Kbp non-overlapping windows across genome**

|                               | Filtered bases<br>(Mbp) | <i>P. tremula</i>                         |                                             | <i>P. tremuloides</i>                     |                                              | <i>P. trichocarpa</i>                     |                                             |
|-------------------------------|-------------------------|-------------------------------------------|---------------------------------------------|-------------------------------------------|----------------------------------------------|-------------------------------------------|---------------------------------------------|
|                               |                         | $\Theta_{\pi}$                            | Tajima's D                                  | $\Theta_{\pi}$                            | Tajima's D                                   | $\Theta_{\pi}$                            | Tajima's D                                  |
| <b>Total</b>                  | 136.47                  | 0.0133(0.0076-<br>0.0236)                 | -0.2723(-0.7727-<br>0.2941)                 | 0.0144(0.0091-<br>0.0247)                 | -1.1688(-1.6003--<br>0.4899)                 | 0.0059(0.0031-<br>0.0125)                 | 0.0643(-0.8266-<br>0.9496)                  |
| <b>0-fold<sup>a</sup></b>     | 16.52                   | 0.0035 <sup>***</sup> (0.001<br>1-0.0085) | -1.0913 <sup>***</sup> (-<br>2.2240-0.0128) | 0.0044 <sup>***</sup> (0.0018<br>-0.0091) | -2.1717 <sup>***</sup> (-2.7932-<br>-1.2275) | 0.0013 <sup>***</sup> (0.000<br>3-0.0043) | -0.4090 <sup>***</sup> (-<br>1.7625-1.4391) |
| <b>4-fold</b>                 | 3.40                    | 0.0108(0.0035-<br>0.0207)                 | -0.2220(-1.4676-<br>0.9667)                 | 0.0120(0.0044-<br>0.0214)                 | -1.3689(-2.2458--<br>0.2602)                 | 0.0040(0.0008-<br>0.0104)                 | 0.0084(-1.5663-<br>1.7753)                  |
| <b>Introns<sup>a</sup></b>    | 31.89                   | 0.0096 <sup>***</sup> (0.003<br>8-0.0182) | -0.2669 <sup>**</sup> (-<br>1.3490-0.7526)  | 0.0106 <sup>***</sup> (0.0046<br>-0.0184) | -1.4286 <sup>**</sup> (-2.2283--<br>0.4173 ) | 0.0038 <sup>**</sup> (0.0013<br>-0.0094)  | -0.0245 <sup>*</sup> (-1.5429-<br>1.6489)   |
| <b>UTR 5<sup>1a</sup></b>     | 4.02                    | 0.0091 <sup>***</sup> (0.003<br>3-0.0192) | -0.5642 <sup>***</sup> (-<br>1.7370-0.6994) | 0.0104 <sup>***</sup> (0.0041<br>-0.0197) | -1.5829 <sup>***</sup> (-2.3688-<br>-0.4202) | 0.0038 <sup>**</sup> (0.0007<br>-0.0102)  | -0.1040 <sup>**</sup> (-<br>1.6203-1.6915)  |
| <b>UTR 3<sup>1a</sup></b>     | 7.19                    | 0.0108(0.0039-<br>0.0190)                 | -0.3081 <sup>**</sup> (-<br>1.4577-0.7662)  | 0.0121(0.0050-<br>0.0204)                 | -1.3842 <sup>*</sup> (-2.2319--<br>0.3766)   | 0.0043(0.0012-<br>0.0101)                 | -0.0033(-1.5265-<br>1.6444)                 |
| <b>Intergenic<sup>a</sup></b> | 73.46                   | 0.0184(0.0110-<br>0.0313)                 | -0.3062 <sup>**</sup> (-<br>0.8360-0.4298)  | 0.0198(0.0130-<br>0.0326)                 | -1.1843(-1.6698--<br>0.3969)                 | 0.0088(0.0044-<br>0.0175)                 | 0.1042(-0.9211-<br>1.1131)                  |

207 <sup>a</sup> One-sided paired Mann-Whitney U test in comparison to the 4-fold synonymous

208 \*  $P<0.05$

209 \*\*  $P<0.001$

210 \*\*\*  $P<2.2\times 10^{-16}$

211

212 **Fig 1. Genome-wide patterns of polymorphism among three *Populus* species.**

213 Nucleotide diversity ( $\Theta_{\pi}$ ) was calculated over 100 Kbp non-overlapping windows in

214 *P. tremula* (orange line), *P. tremuloides* (blue line) and *P. trichocarpa* (green line)  
215 along the 19 chromosomes.

216

217 **Fig 2. Correlations of polymorphism, Tajima's D and population recombination**  
218 **rate between species.** Distributions and correlations of (a) pairwise nucleotide  
219 diversity ( $\Theta_{\pi}$ ), (b) Tajima's D, (c) population-scaled recombination rate ( $\rho$ ) between  
220 pairwise comparisons of *P. tremula*, *P. tremuloides* and *P. trichocarpa*, over 100 Kbp  
221 non-overlapping windows. The red to yellow to blue gradient indicates decreased  
222 density of observed events at a given location in the graph. Spearman's rank  
223 correlation coefficient ( $\rho$ ) and the *P*-value are shown in each subplot. (\*\*\*  $P < 2.2 \times 10^{-16}$ ,  
224 \*\*  $P < 0.001$ ). The dotted grey line in each subplot indicates simple linear regression  
225 line with intercept being zero and slope being one.

226

227 Along all chromosomes, the distribution of polymorphisms was more variable  
228 (average coefficient of variation (CV) of  $\Theta_{\pi}$  among three species=0.3362) than was  
229 divergence (average CV of  $d_{xy}$ =0.1670) (Fig 1; S4 Fig). As the *Populus* karyotype  
230 has not been established and thus the locations of centromeres and telomeres remains  
231 unknown, we can only speculate that the genomic regions with long measurement  
232 gaps that failed to pass our quality requirements may represent repetitive regions of  
233 chromosomes located near centromeres, and with distal chromosomal regions being  
234 the approximate locations of telomeres. Fig 1 shows that diversity generally declines  
235 near the supposed locations of centromeres and telomeres in all three *Populus* species.  
236 Divergence, however, did not show similar patterns of decline in such regions (S4  
237 Fig), potentially indicating that the reduced polymorphism in these regions is most  
238 likely due to a greater influence of selection at linked sites because of reduced

239 recombination in these regions (see below) rather than reduced neutral mutation rates  
240 [2].

241

# 242 **Tajima's D varies, and is weakly correlated, between species**

243 Genome-wide allele frequency distributions can also help elucidate the relative  
244 contributions of different evolutionary dynamics in charactering patterns of  
245 polymorphism. We compared the site frequency spectrum among the three species  
246 based on the Tajima's D statistic [38], which is the standardized difference between  
247 the average pairwise sequence diversity ( $\Theta_{\pi}$ ) and the number of segregating sites  
248 ( $\Theta_w$ ). Under the standard neutral model, the expected value of Tajima's D is roughly  
249 equal to 0 ( $\Theta_{\pi} = \Theta_w$ ). Negative Tajima's D ( $\Theta_{\pi} < \Theta_w$ ; an excess of rare alleles)  
250 usually results from purifying selection, selective sweeps, or population expansion,  
251 whereas positive Tajima's D ( $\Theta_{\pi} > \Theta_w$ ; an excess of common alleles) indicates either  
252 balancing selection or a decrease in population size. We found dramatically different  
253 patterns in the genome-wide distribution of Tajima's D among the three species (Fig  
254 3). The genome-wide average of Tajima's D was slightly positive in *P. trichocarpa*,  
255 whereas *P. tremula* had negative genome-wide averages of Tajima's D (Table1; Fig  
256 3; S6c Fig). Compared to *P. trichocarpa* (average Tajima's D=0.064) and *P. tremula*  
257 (average Tajima's D=-0.272), *P. tremuloides* (average Tajima's D=-1.169) showed  
258 substantially more negative values of Tajima's D along all chromosomes (Fig 3; S6c  
259 Fig), reflecting a large excess of low-frequency polymorphisms across the genome.  
260 As natural selection is usually expected to act on a relatively small number of  
261 genomic regions, the marked genome-wide negative Tajima's D is most likely to be  
262 explained by a recent substantial expansion in population size in *P. tremuloides*. The  
263 weakly negative Tajima's D in *P. tremula* could also reflect an increase in population

size although not as great as that experienced by *P. tremuloides*. The slightly positive Tajima's D in *P. trichocarpa*, however, implies that it may have experienced a recent population contraction as was also suggested by [39]. In contrast to the significantly positive correlations of nucleotide diversity among the three species, the much weaker correlations seen for Tajima's D (Fig 2b) could be ascribed to either the different demographic histories of these species, or result from different targets of divergent selection due to different environmental conditions experienced by the species since their divergence [37].

**Fig 3. Genome-wide patterns of allele frequency distribution among three *Populus* species.** Tajima's D was calculated over 100 Kbp non-overlapping windows in *P. tremula* (orange line), *P. tremuloides* (blue line) and *P. trichocarpa* (green line) along the 19 chromosomes.

**Little confounding effects of population structure, biased sampling schemes and hybridization**

The observed variation of intra-species population genetic patterns could also be caused by other factors, such as population sub-structure, biased sampling schemes and/or hybridization [40, 41]. We found no obvious population sub-structure in samples among all three species (S3 Fig) and thus expect that any effect of population structure is negligible in structuring polymorphisms in these three species. Biased sampling schemes could lead to biased estimates of genome-wide diversity and allele frequency spectrum as the samples of *P. tremula* and *P. trichocarpa* were all collected from continuous local populations whereas those of *P. tremuloides* were collected from two discrete populations (S1 Fig). The lack of population substructure suggests

that bias is unlikely, but to be sure we tested this by calculating  $\Theta_{\Pi}$  and Tajima's D separately for the two local *P. tremuloides* populations (Alberta and Wisconsin). We observed remarkably similar values of  $\Theta_{\Pi}$  in both local population samples and the pooled samples (S7a Fig), confirming that structured sampling in this species does not affect our results. Values of Tajima's D were slightly skewed toward more negative for the pooled samples compared with single sampling localities (S7b Fig), likely reflecting low sharing of low-frequency polymorphisms between these localities which is consistent with widespread population expansion. This seems unlikely to influence the comparison of the overall patterns of genetic variation among the species. An additional possibility is that the excess of rare alleles we observed in *P. tremuloides* could be derived from one or few "outlier" individuals that are misidentified or are recent inter-specific hybrids. To assess this possibility we calculated the number of singletons contributed by each individual in the dataset. We found an overall higher number of singletons in individuals of *P. tremuloides* relative to the other two species, which was expected from patterns of Tajima's D, but there were no outlier individuals in *P. tremuloides* that contribute disproportionately large numbers of singletons (S8 Fig). Together these results indicate that the genome-wide excess of rare variants we observed in *P. tremuloides* is a species-wide pattern rather than being population or individual specific.

308

### 309 **Patterns of polymorphism and divergence vary by genomic contexts**

We compared patterns of nucleotide diversity and divergence across different genomic contexts and in all comparisons levels of nucleotide diversity and divergence were highest for intergenic sites, followed by 4-fold synonymous sites, 3'UTRs, 5'UTRs, introns and were lowest at 0-fold non-synonymous sites (Table 1; S3 Table;

S9 Fig; S11 Fig). The extremely high levels of diversity and divergence in intergenic regions could arise due artifacts of mapping errors in repetitive sequences [42]. However, we applied the same strict filtering steps in both genic and intergenic regions, making this error bias less likely. Therefore, the markedly higher levels of diversity and divergence in intergenic regions probably result from a higher mutation rate, a relaxed selective constraint or both [2]. If we assume that the mutation rate of intergenic regions does not differ from that in genic regions, we could infer that there is strong selective constraint on all genic features throughout the genomes. Nevertheless, the relative contribution of alternative factors to the higher divergence rate in intergenic regions requires further investigation.

Within genic regions, 3' UTRs showed only slightly lower levels of divergence and similar levels of diversity and allele frequency distribution compared to 4-fold synonymous sites (Table 1; S3 Table). This suggests that the large majority of sites in 3' UTRs are effectively neutral or are subject to purifying selection to an extent comparable to 4-fold synonymous sites. We found a slight, but significant, reduction in diversity, Tajima's D and divergence in introns and 5' UTRs, consistent with the notion that introns and 5'UTRs have undergone stronger selective constraint than 4-fold synonymous sites (Table 1; S3 Table). Finally, both diversity and divergence at 0-fold non-synonymous sites was nearly three times lower than 4-fold synonymous sites. In accordance with this, we found significantly lower Tajima's D at 0-fold non-synonymous sites compared to 4-fold synonymous sites ( $P < 0.001$ , Mann-Whitney U test) (Table 1), indicating that a large majority of amino acid substitutions are under strong purifying selection [43].

### Linkage Disequilibrium (LD) and Recombination

339 *Populus* species are predominantly outcrossing and thus the expectation is thus that  
 340 LD decays rapidly and that the rates of scaled recombination are high [44]. However,  
 341 a recent genome-wide analysis in *P. trichocarpa* has revealed more extensive LD  
 342 across the genome that was expected based on earlier studies [45]. We found that the  
 343 average LD ( $r^2$ ) between pairs of SNPs fell to lower than 0.2 within approximately 6-  
 344 7 Kbp in *P. trichocarpa* (Fig 4), which is consistent with values previously reported in  
 345 this species [45]. In *P. tremula*, mean  $r^2$  dropped below 0.2 within about 5 Kbp, which  
 346 is substantially greater than reported in earlier studies that were based on a small  
 347 number of candidate gene fragments [44]. Finally, LD decayed considerably more  
 348 rapidly in *P. tremuloides* compared to the other two species, with mean  $r^2$  dropping  
 349 below 0.2 within ~2-3 Kbp (Fig 4).

350

351 **Fig 4. Decay of linkage disequilibrium (LD).** The decay of LD (estimated as  $r^2$ )  
 352 with physical distance in *P. tremula* (orange line), *P. tremuloides* (blue line) and *P.*  
 353 *trichocarpa* (green line).

354

355 We also estimated population-scaled recombination rates ( $\rho$ ) in each species.  
 356 There was considerable large-scale variation in recombination rates throughout the  
 357 genomes of all three species, with  $\rho$  in *P. tremuloides* consistently being higher than  
 358 in the other two species (Fig 5). In accordance with the genome-wide patterns of  
 359 diversity, we also found patterns of decreasing  $\rho$  near the putative locations of  
 360 centromeres and telomeres in all three species (Fig 5). When we measured the average  
 361  $r^2$  over 100 Kbp non-overlapping windows across the genome, we found population  
 362 recombination rates were significantly correlated with the extent of LD (mean  
 363 pairwise  $r^2$ ) in all species (S12 Fig). The mean  $\rho$  computed from 100 Kbp windows in

364 *P. tremuloides* was 8.42 Kbp<sup>-1</sup> (standard deviation of 4.71 Kbp<sup>-1</sup>), and the mean  $\rho$  in  
 365 *P. tremula* was 3.23 Kbp<sup>-1</sup> (standard deviation: 1.66 Kbp<sup>-1</sup>). The genome-wide  
 366 average  $\rho$  in *P. trichocarpa* was 2.19 Kbp<sup>-1</sup> (standard deviation: 1.11 Kbp<sup>-1</sup>), which is  
 367 consistent with the previously reported  $\rho$  value estimated from exome re-sequencing  
 368 data [39]. Concordant  $\rho$  values for all three species were also observed in 1Mbp  
 369 windows (S6d Fig). In comparison to the extremely high correlation of diversity and  
 370 low correlation of allele frequency spectrum among the three *Populus* species (Fig  
 371 2a,b), we found an intermediate correlation in recombination rates between species,  
 372 suggesting that the overall recombination environment is only partially conserved  
 373 among the three species (Fig 2c).

374

375 **Fig 5. Genome-wide patterns of population-scaled recombination rate among**  
 376 **three *Populus* species.** Population-scaled recombination rate ( $\rho$ ) was averaged over  
 377 100 Kbp non-overlapping windows in *P. tremula* (orange line), *P. tremuloides* (blue  
 378 line) and *P. trichocarpa* (green line) along the 19 chromosomes.

379

380 For populations under drift-mutation-recombination equilibrium,  $\rho = 4N_e c$   
 381 (where  $N_e$  is the effective population size and  $c$  is the recombination rate) and  $\theta_w =$   
 382  $4N_e \mu$  (where  $N_e$  is the effective population size and  $\mu$  is the mutation rate). In order to  
 383 compare the relative contribution of recombination ( $c$ ) and mutation ( $\mu$ ) in shaping  
 384 genomic variation, we measured the ratio of population recombination rate to the  
 385 nucleotide diversity ( $\rho/\theta_w$ ) across the genome (S13 Fig). The mean  $c/\mu$  in *P.*  
 386 *tremuloides* and *P. trichocarpa* was 0.39 and 0.38 respectively, indicating that  
 387 mutations occur approximately two to three times more frequently than recombination  
 388 events. On the other hand, the average value of  $c/\mu$  in *P. tremula* was 0.22, implying



389 that recombination is less important than mutation in generating diversity in *P.*  
390 *tremula* compared to the other two *Populus* species.

391

392 **Neutral polymorphism, not divergence, is positively correlated with**  
393 **recombination rate**

394 If natural selection is pervasive across the genome, positive correlations between  
395 levels of neutral polymorphisms and recombination rates are expected since  
396 demography alone is unlikely to generate these patterns [8]. If selection is the primary  
397 force driving the association of neutral polymorphism and recombination rate, the  
398 association should be stronger in genic regions of the genome than in intergenic  
399 regions since genes are more likely to be targets of selection. In order to examine  
400 these correlations, we first assumed that 4-fold synonymous sites in genic regions  
401 represent selectively neutral sites, as every possible mutation in 4-fold degenerate  
402 sites is synonymous. In the following we refer to the pairwise nucleotide diversity at  
403 4-fold synonymous sites ( $\theta_{4\text{-fold}}$ ) as “neutral polymorphism”. We then measured the 4-  
404 fold synonymous substitution rate ( $d_{4\text{-fold}}$ ) between either of the two aspen species and  
405 *P. trichocarpa* and used this to represent “neutral divergence”, which was further  
406 taken as a proxy for the neutral mutation rate [46]. As many other genomic features  
407 may also influence the variation of neutral polymorphism, we also tabulated GC  
408 content, gene density and the number of neutral bases covered by sequencing data for  
409 all three species. All measurements were carried out in non-overlapping windows that  
410 were either 100 Kbp or 1Mbp in size.

411 We found significantly positive correlations between the level of neutral  
412 polymorphism ( $\theta_{4\text{-fold}}$ ) and population recombination rate for the two aspen species  
413 (Table 2), with correlations being stronger in *P. tremula* compared to *P. tremuloides*.

In *P. trichocarpa*, however, we found either no or weak correlation between diversity and recombination (Table 2). Compared to 100 Kbp windows, the correlations were stronger in 1Mbp windows among all species, which most likely results from the higher signal-to-noise ratio provided by larger genomic regions (Table 2). In the remainder of this paper we therefore focus our analyses primarily on data generated using 1Mbp window size. We performed simple linear regression analysis between recombination rate and diversity, and the recombination rate explained 45.8%, 21.3%, and 3.9% of the amount of neutral genetic variation in *P. tremula*, *P. tremuloides* and *P. trichocarpa*, respectively (Fig 6).

**Table 2.** Summary of the correlation coefficients (Spearman's  $\rho$ ) between levels of neutral polymorphism, divergence and recombination rate in all three *Populus* species.

| Dataset | Species               | $\rho$ vs. $\theta_{4\text{-fold}}$ |                      | $\rho$ vs. $d_{4\text{-fold}}$ | $\rho$ vs. $\theta_{\text{Intergenic}}$ |                      | $\rho$ vs. $d_{\text{Intergenic}}$ |
|---------|-----------------------|-------------------------------------|----------------------|--------------------------------|-----------------------------------------|----------------------|------------------------------------|
|         |                       | Pairwise                            | Partial <sup>a</sup> |                                | Pairwise                                | Partial <sup>b</sup> |                                    |
| 100Kbp  | <i>P. tremula</i>     | 0.339 <sup>***</sup>                | 0.309 <sup>***</sup> | 0.043                          | 0.062 <sup>**</sup>                     | 0.142 <sup>***</sup> | -0.077 <sup>**</sup>               |
|         | <i>P. tremuloides</i> | 0.310 <sup>***</sup>                | 0.284 <sup>***</sup> | 0.061 <sup>**</sup>            | -0.037                                  | 0.100 <sup>**</sup>  | -0.029                             |
|         | <i>P. trichocarpa</i> | 0.011                               | -0.024               | 0.053 <sup>*</sup>             | -0.080 <sup>**</sup>                    | -0.002               | -0.015                             |
| 1Mbp    | <i>P. tremula</i>     | 0.647 <sup>***</sup>                | 0.573 <sup>***</sup> | -0.070                         | 0.201 <sup>**</sup>                     | 0.348 <sup>**</sup>  | -0.209 <sup>**</sup>               |
|         | <i>P. tremuloides</i> | 0.400 <sup>**</sup>                 | 0.363 <sup>**</sup>  | -0.033                         | 0.032                                   | 0.320 <sup>**</sup>  | -0.127 <sup>*</sup>                |
|         | <i>P. trichocarpa</i> | 0.227 <sup>**</sup>                 | 0.151 <sup>*</sup>   | -0.027                         | -0.072                                  | 0.165 <sup>*</sup>   | -0.120 <sup>*</sup>                |

<sup>a</sup>Partial correlation controls for GC content, gene density, divergence of 4-fold synonymous sites between aspen and *P. trichocarpa*, and coverage (the number of 4-fold synonymous bases covered by sequencing data).

<sup>b</sup>Partial correlation controls for GC content, gene density, divergence of intergenic sites between aspen and *P. trichocarpa*, and coverage (the number of intergenic bases covered by sequencing data).

\*  $P < 0.05$

433 \*\*  $P < 0.001$

434 \*\*\*  $P < 2.2 \times 10^{-16}$

435

436 **Fig 6. Correlations between estimates of neutral genetic diversity and divergence**  
 437 **with population recombination rates over 1Mbp non-overlapping windows.**

438 Correlations between estimates of 4-fold synonymous diversity ( $\Theta_{4\text{-fold}}$ ) (left panel)  
 439 and divergence ( $d_{4\text{-fold}}$ ) (right panel) with population-scaled recombination rate ( $\rho$ )  
 440 over 1Mbp non-overlapping windows. Linear regression lines are colored according  
 441 to species: (a) *P. tremula* (orange line), (b) *P. tremuloides* (blue line) and (c) *P.*  
 442 *trichocarpa* (green line).

443

444 If the relationship between diversity and recombination rate was merely  
 445 caused by the mutagenic effect of recombination, similar correlations should also be  
 446 observed between divergence and recombination rate. However, no such correlations  
 447 were observed in any of the three species (Table 2; Fig 6). The association between  
 448 recombination rate and nucleotide diversity, and not with divergence, is thus most  
 449 likely caused by the effects of linked natural selection, where the elimination of linked  
 450 polymorphisms caused by selection is disproportionately stronger in low-  
 451 recombination genomic regions relative to regions of high recombination [8-10, 47].  
 452 Moreover, among all three species, the correlations between neutral polymorphism  
 453 and recombination rate remained significant even after we performed partial  
 454 correlation analyses to control for several possible confounding factors such as GC  
 455 content, gene density, divergence at neutral sites, and the number of neutral bases  
 456 covered by sequencing data (Table 2).

457 In accordance with the view that genes represent the most likely targets of  
 458 natural selection, the correlations between intergenic diversity and recombination rate

were substantially weaker than those correlations in genic regions (Table 2). Only 7.3% of intergenic genetic variation in *P. tremula* could be explained by recombination, whereas the impact of recombination rate on intergenic diversity in *P. tremuloides* and *P. trichocarpa* was <1% and could be considered negligible (Table 2; S14 Fig). In addition, we found slightly negative correlation between the divergence and recombination in intergenic regions (Table 2; S14 Fig). This pattern is likely to be explained by Hill-Robertson interference where weakly deleterious intergenic mutations would reach fixation due to ineffective purifying selection in regions of low recombination [48]. Further investigation is required to support this assertion. Notably, after controlling for GC content, gene density, divergence and the number of covered intergenic bases using partial correlation analyses, the correlations between intergenic diversity and recombination rate become significant in all species, but remained relatively weak compared to the values for genic regions in the two aspen species (Table 2).

473

#### **Inconsistent effect of gene density on patterns of polymorphism in genic vs. intergenic regions**

Genome-wide signatures of linked selection are not only influenced by the local environments of recombination rate, but also are sensitive to the density of functionally important sites within specific genomic regions [14]. Genomic regions with a high density of genes are therefore expected to have undergone stronger effects of linked selection and should therefore exhibit lower levels of neutral polymorphism [1, 14]. However, a positive or negative co-variation of gene density and recombination rate would either act to obscure or strengthen the genome-wide signatures of linked selection, respectively [7, 14, 49]. We measured gene density as

the number of protein-coding genes in each 1Mbp window, which was unsurprisingly also found to be highly correlated with the proportion of coding bases in each window (S15 Fig). In all three *Populus* species, we found significantly positive correlation between population recombination rate and gene density (Fig 7a). However, rather than being linear, the relationships between recombination rate and gene density were found to be curvilinear in all three species, with a significant positive correlation observed only in regions of lower gene density (gene number smaller than ~85 within each 1Mbp window) (Table 3). In clear contrast, in high gene density regions (gene number greater than ~85 within each 1Mbp window) we observed no correlations between recombination rate and gene density in any of the two aspen species, and only weak correlation in *P. trichocarpa* (Table 3; Fig 7a). These correlation patterns persisted after controlling for the GC content and the number of bases covered by sequencing data in each window (Table 3).

497

**Fig 7. Correlations between estimates of population recombination rates, genic and intergenic genetic diversity with gene density over 1 Mbp non-overlapping windows.** (a) Correlations between gene density and population-scaled recombination rate ( $\rho$ ) in *P. tremula* (left panel), *P. tremuloides* (middle panel) and *P. trichocarpa* (right panel). (b) Correlations between gene density and neutral genetic diversity ( $\Theta_{4\text{-fold}}$ ) in *P. tremula*, *P. tremuloides* and *P. trichocarpa*. (c) Correlations between gene density and intergenic genetic diversity ( $\Theta_{\text{Intergenic}}$ ) in *P. tremula*, *P. tremuloides* and *P. trichocarpa*. Grey points represent the statistics computed over 1Mbp non-overlapping windows. Colored lines denote the lowess curves fit to the two variables in each species.

508

**Table 3.** Summary of the correlation coefficients (Spearman's  $\rho$ ) between gene density and population recombination rate, neutral polymorphism in genic and intergenic regions over 1 Mbp non-overlapping windows in three *Populus* species.

| Species               | Correlation type | Gene density vs. $\rho^a$ |        | Gene density vs. $\theta_{4\text{-fold}}^b$ |         | Gene density vs. $\theta_{\text{intergenic}}^c$ |           |
|-----------------------|------------------|---------------------------|--------|---------------------------------------------|---------|-------------------------------------------------|-----------|
|                       |                  | low                       | high   | low                                         | high    | low                                             | high      |
| <i>P. tremula</i>     | Pairwise         | 0.674**                   | -0.112 | 0.601**                                     | -0.180* | 0.431**                                         | -0.605*** |
|                       | Partial          | 0.516**                   | 0.263* | 0.191*                                      | 0.110   | 0.263*                                          | -0.438**  |
| <i>P. tremuloides</i> | Pairwise         | 0.527**                   | 0.006  | 0.576**                                     | -0.077  | 0.419**                                         | -0.600*** |
|                       | Partial          | 0.315**                   | 0.048  | 0.407**                                     | 0.280** | 0.363**                                         | -0.444**  |
| <i>P. trichocarpa</i> | Pairwise         | 0.609**                   | 0.168* | 0.417**                                     | -0.033  | 0.529**                                         | -0.513*** |
|                       | Partial          | 0.477**                   | 0.193* | 0.242*                                      | 0.263** | 0.432**                                         | -0.273**  |

<sup>a</sup>Partial correlation controls for GC content and the number of bases covered by the data

<sup>b</sup>Partial correlation controls for GC content, population recombination rate, divergence of 4-fold synonymous sites between aspen and *P. trichocarpa*, and coverage (the number of 4-fold synonymous bases covered by sequencing data).

<sup>c</sup>Partial correlation controls for GC content, population recombination rate, divergence of intergenic sites between aspen and *P. trichocarpa*, and coverage (the number of intergenic bases covered by sequencing data).

\*  $P < 0.05$

\*\*  $P < 0.001$

\*\*\*  $P < 2.2 \times 10^{-16}$

We then examined the correlation between neutral polymorphism and gene density. Compared to the prediction of lower diversity in regions with higher functional density [50], we found that the correlation pattern between genic diversity and gene density was highly consistent with the pattern found in recombination rate, where significantly positive correlations were found in regions of lower gene density and either no correlation or weak negative correlations were found in regions of

529 higher gene density (Table 3; Fig 7b). After controlling for potential confounding  
530 variables such as GC content, recombination rate, neutral divergence, and the number  
531 of covered sites in each window, weaker but significant positive correlations between  
532 neutral diversity and gene density remained in all three species in regions of low gene  
533 density (Table 3). Positive associations between neutral diversity and gene density  
534 were also found in high gene-density regions (Table 3).

535 Compared with genic regions, different correlation patterns between intergenic  
536 diversity and gene density were found in all three species (Fig 7c). In accordance with  
537 genic regions, we found significantly positive correlation between intergenic diversity  
538 and gene density in regions of lower gene density. However, in regions of higher gene  
539 density, strongly negative correlations between intergenic diversity and gene density  
540 were observed in all three species (Table 3; Fig 7c). Due to the lack of correlation  
541 between intergenic divergence and gene density (S16 Fig), our findings suggest that  
542 the levels of intergenic polymorphism are also largely affected by natural selection,  
543 with the intensity of selection increasing with an increase of gene density. These  
544 correlations remained significant even after controlling for possible confounding  
545 variables (Table 3).

546

# 547 **Lack of correlation between synonymous diversity and non-synonymous** 548 **divergence**

549 A distinctive signature of recurrent selective sweeps is the local reduction of linked  
550 neutral polymorphism due to frequent adaptive substitutions [51]. Given amino acid  
551 substitutions compose a substantial number of adaptive substitutions, negative  
552 correlation between neutral polymorphism and non-synonymous divergence can be  
553 particularly informative of the prevalence of selective sweeps [52]. However, in all

three species, we found either no or weak negative correlations between neutral polymorphism ( $\theta_{4\text{-fold}}$ ) and the rate of non-synonymous substitutions ( $d_{0\text{-fold}}$ ) in both 100 Kbp and 1 Mbp windows (S4 Table). The correlational patterns did not change after we controlled for GC content, recombination rate, gene density, neutral divergence rate, and the number of 4-fold synonymous and 0-fold non-synonymous sites covered by the data (S4 Table). This result contrasts with our previous study reported from a small number of candidate genes, where we found a significant negative correlation between polymorphism at synonymous sites and amino acid divergence in *P. tremula* [53]. One possible explanation for the different patterns between these two studies is that they are based on different scales of measurement, from single genes to 100 Kbp and 1 Mbp windows [52]. Accordingly, additional future analyses are still needed to examine the relationship between the synonymous polymorphism and the rate of amino acid evolution on a genic scale.

# **The effect of recombination on the efficacy of natural selection**

We next characterized the ratio of non-synonymous to synonymous polymorphism ( $\theta_{0\text{-fold}}/\theta_{4\text{-fold}}$ ) and divergence ( $d_{0\text{-fold}}/d_{4\text{-fold}}$ ) for each of the three *Populus* species in order to assess whether there is a relationship between the efficacy of natural selection and the rate of recombination (Table 4). Once GC content, gene density and number of 4-fold synonymous and 0-fold non-synonymous sites were taken into account, we found no correlation between recombination rate and  $d_{0\text{-fold}}/d_{4\text{-fold}}$  in all three species (Table 4). We did not observe any significant correlations between recombination rate and  $\theta_{0\text{-fold}}/\theta_{4\text{-fold}}$  in the 1 Mbp windows after controlling for the various confounding factors (Table 4). However, for 100 Kbp windows, we found significantly negative correlations between recombination rate and  $\theta_{0\text{-fold}}/\theta_{4\text{-fold}}$  in *P. tremula* and *P.*



579 *tremuloides*, but not in *P. trichocarpa*. The relative overabundance of non-  
580 synonymous polymorphism in regions of low recombination most likely suggests that  
581 the effective elimination of weakly deleterious non-synonymous mutations was  
582 reduced in low recombination regions in the two aspen species [12]. The lack of such  
583 correlation in *P. trichocarpa* may reflect its lower effective population size and  
584 accordingly weaker efficacy of selection across the genome [54]. In addition, since no  
585 correlation between  $\theta_{0\text{-fold}}/\theta_{4\text{-fold}}$  and recombination rate was observed at a broad scale  
586 (1 Mbp) in any of the three species, it is likely that interference between weakly  
587 selected mutations is more easier to be detected at fine scales [54], although this  
588 requires further investigation.

589

590 **Table 4.** Summary of the correlation coefficients (Spearman's  $\rho$ ) between  
591 recombination rate and the ratio of non-synonymous to synonymous polymorphism  
592 ( $\theta_{0\text{-fold}}/\theta_{4\text{-fold}}$ ) and divergence ( $d_{0\text{-fold}}/d_{4\text{-fold}}$ ).

| Dataset | Species               | $\rho$ vs. $\theta_{0\text{-fold}}/\theta_{4\text{-fold}}$ |                      | $\rho$ vs. $d_{0\text{-fold}}/d_{4\text{-fold}}$ |                      |
|---------|-----------------------|------------------------------------------------------------|----------------------|--------------------------------------------------|----------------------|
|         |                       | Pairwise                                                   | Partial <sup>a</sup> | Pairwise                                         | Partial <sup>a</sup> |
| 100Kbp  | <i>P. tremula</i>     | -0.057*                                                    | -0.075**             | -0.012                                           | -0.005               |
|         | <i>P. tremuloides</i> | -0.118**                                                   | -0.122**             | -0.003                                           | -0.002               |
|         | <i>P. trichocarpa</i> | -0.004                                                     | -0.002               | -0.026                                           | -0.020               |
| 1Mbp    | <i>P. tremula</i>     | -0.063                                                     | -0.045               | -0.007                                           | 0.017                |
|         | <i>P. tremuloides</i> | -0.142*                                                    | -0.092               | 0.014                                            | 0.020                |
|         | <i>P. trichocarpa</i> | 0.035                                                      | -0.002               | 0.030                                            | 0.036                |

593 <sup>a</sup>Partial correlation controls for GC content, gene density, and the number of 4-fold synonymous and 0-  
594 fold non-synonymous bases covered by sequencing data.

595 \* $P < 0.05$

596 \*\* $P < 0.001$

597

## 598 Discussion

599 We have characterized and compared genome-wide nucleotide polymorphism, site  
600 frequency spectra, linkage disequilibrium (LD), and population-scaled recombination  
601 rates among three related *Populus* species. Widespread variation in nucleotide  
602 diversity is found throughout the genomes of all three species and we found  
603 significant genome-wide correlations of diversity among the three *Populus* species.  
604 This likely results from shared selective constraints and/or patterns of conserved  
605 variation in mutation rate between these related species [55, 56]. Compared to *P.*  
606 *trichocarpa*, levels of diversity in *P. tremula* and *P. tremuloides* are more than two-  
607 fold higher throughout the genome. The higher diversity we find in both aspen species  
608 is likely due to their larger effective population sizes ( $N_e$ ) because consistent patterns  
609 of interspecific sequence divergence between independent evolutionary lineages (S5  
610 Fig) indicate that mutation rates are likely to be conserved among the three species  
611 [4]. Larger effective population sizes in the two aspen species are also in agreement  
612 with their larger current census population size and substantially more extensive  
613 geographic ranges [24]. Assuming that mutation rates do not differ dramatically  
614 among the three species, we could infer that the effective population size in the two  
615 aspen species are more than twice as large as in *P. trichocarpa* [4]. However, the  
616 relative importance of mutation rate variation in determining diversity levels across  
617 related species obviously deserves to be studied further, particularly in light of very  
618 recent results indicating that high levels of heterozygosity, as are observed in these  
619 species, can increase local and genome-wide mutation rates [57].

620 Compared to the consistent patterns of diversity among species, the much  
621 weaker correlations observed for allele frequency spectrum (Tajima's D) could either  
622 be ascribed to divergent selective targets to different environments since their

divergence, or different demographic histories experienced by the three species during the Quaternary ice ages [39, 44, 58]. In particular, the genome-wide excess of rare frequency alleles in *P. tremuloides* is most likely explained by a recent substantial population expansion that was specific to this species. Many other factors, such as population structure, an unbalanced sampling scheme, and hybridization, can influence estimates of genomic variation and may therefore contribute to the different patterns observed among species [40, 41, 59], but we were able to exclude each of these. First, in accordance with mating characteristics of the genus where the seed and pollen are both wind-dispersed, we found little evidence of population structure in any of the three *Populus* species in this study. Second, despite a potentially biased sampling scheme in *P. tremuloides*, where the samples were collected from two geographically distinct populations, when we analyzed the genome-wide patterns of polymorphism separately we found the same patterns as those obtained when analyzing the populations jointly. Third, with regard to the influence of hybridization, it should be noted that there are no other species of *Populus* that occur naturally in the regions from where the *P. tremula* samples were collected [60]. For *P. tremuloides*, naturally occurring hybridization is only known to occur at very low levels with *P. grandidentata* [61]. These two species occur sympatrically in central and eastern North America, so in our study any possible hybridization in *P. tremuloides* would be limited to samples from the Wisconsin population. Although hybridization with other nearby *Populus* species is more frequent in *P. trichocarpa* [41], in this study we only used individuals of *P. trichocarpa* that have previously been shown having no evidence of admixture with other species [31].

The recombination rate and the extent of linkage disequilibrium (LD) are key factors influencing the feasibility and power of genome-wide association studies [62,

648 63]. The three *Populus* species exhibit different patterns in the decay of LD ( $r^2$ ) with  
 649 physical distance, with LD decaying fastest in *P. tremuloides* and slowest in *P.*  
 650 *trichocarpa*. This reflects the rank order of their population-scaled recombination rate  
 651 ( $\rho=4N_e c$ ), for which *P. tremuloides* is the highest (8.42 Kbp<sup>-1</sup>), followed by *P.*  
 652 *tremula* (3.23 Kbp<sup>-1</sup>), and *P. trichocarpa* is the lowest (2.19 Kbp<sup>-1</sup>). It is important to  
 653 note that differences in  $\rho$  among the species cannot simply reflect differences in  
 654 species'  $N_e$ , because recombination rate correlations in 100 Kbp windows show that  $\rho$   
 655 is only partially (not highly) conserved among these species (Fig 2c) [64]. This  
 656 suggests that even with conserved gene function and synteny, associations might be  
 657 more easily discovered in one *Populus* species than another.

658 The genome-wide ratio of recombination to mutation rate ( $\rho/\theta_w$  or  $c/\mu$ ) was  
 659 similar between *P. tremuloides* (0.39) and *P. trichocarpa* (0.38), but substantially  
 660 smaller in *P. tremula* (0.22). If mutation rate is indeed unchanged between species,  
 661 the lower estimate of  $c/\mu$  in *P. tremula* indicates a considerably smaller recombination  
 662 rate relative to the other species. Nevertheless, these  $c/\mu$  estimates are of the same  
 663 order of magnitude as recent genome-wide estimates of other plant species, such as  
 664 *Medicago truncatula* (0.29) [15], *Mimulus guttatus* (0.8) [65] and the tree *Eucalyptus*  
 665 *grandis* (0.65) [66]. However, the discrepant results obtained from patterns of  
 666 polymorphism and recombination between *P. tremula* and *P. tremuloides* are likely  
 667 due to differences in the effective population sizes influencing patterns of nucleotide  
 668 diversity and linkage disequilibrium [67]. These processes operate over different  
 669 time-scales and are therefore subject to temporal variation in the effective population  
 670 size [67, 68]. The recent population size expansion that we infer to have taken place  
 671 in *P. tremuloides* can thus also explain why its recombination rate is higher than *P.*  
 672 *tremula*, even if they share similar levels of genome-wide polymorphism.

673           In addition to the historical patterns of mutation, recombination and  
674 demographic processes, patterns of genomic variation also contain much information  
675 about natural selection [54]. In all three species, as expected we find 0-fold non-  
676 synonymous sites exhibit significantly lower levels of polymorphism and divergence  
677 compared to 4-fold synonymous sites. The 0-fold non-synonymous sites are likely  
678 experiencing strong selective constraint, consistent with their excess of ultra-rare  
679 variants as indicated by Tajima's D [69]. In addition, introns and 5' UTR sites are  
680 also likely to be under some degree of selective constraint, although much weaker  
681 than non-synonymous sites. The 3' UTR sites seem to be either neutral or under  
682 comparable extent of selective constraint as 4-fold synonymous sites [70]. In contrast  
683 to all genic categories, we find there are substantially higher levels of polymorphism  
684 and divergence in intergenic regions throughout the genome, reflecting either higher  
685 mutation rates, relaxed selective constraint or both in these regions [2].

686           Apart from strong selective constraints on protein-coding genes, multiple lines  
687 of evidence indicate that genomic patterns of polymorphism have been primarily  
688 shaped by widespread natural selection in all three *Populus* species. First, we find  
689 significantly positive correlations between neutral polymorphism and population-  
690 scaled recombination rate in both genic and intergenic regions, even after controlling  
691 for the confounding variables such as GC content, gene density, mutation rate and  
692 number of covered sites by the data. Such patterns could be explained by both  
693 background selection and recurrent selective sweeps, where perturbations of linked  
694 selection on neutral genetic variation are more drastic and extensive in regions of low  
695 recombination compared to high recombination regions [8, 9, 71]. An alternative  
696 explanation to natural selection would be that recombination itself has a mutagenic  
697 effect [47]. In this case, the neutral theory predicts that we would also detect a

698 correlation between nucleotide divergence and recombination rate [10, 47] but this  
699 relationship was not observed for any of the three species. Thus our findings support  
700 the notion that ubiquitous linked selection, as selective sweeps of adaptive alleles  
701 and/or background selection against deleterious alleles, is the dominant force shaping  
702 the observed associations between recombination and neutral polymorphism in all  
703 three species [72]. In addition, the extent of such associations can also reflect the  
704 magnitude of the impact of linked selection on genomes [54, 73]. Here, we tried to  
705 decipher the factors that may contribute to inconsistent signatures and magnitudes of  
706 linked selection across the three species. First of all, the genome-wide effects of  
707 linked selection ought to be influenced by effective population size ( $N_e$ ) across  
708 species, where the impact of selection at linked sites should be more severe in larger  
709 populations [73, 74]. As a result, the substantially stronger signatures of linked  
710 selection in *P. tremula* and *P. tremuloides* are most likely due to their larger  $N_e$   
711 compared to *P. trichocarpa*. Furthermore, just as the impact of natural selection at  
712 linked sites depends on the local environment of recombination, we expect that the  
713 disparate patterns of linked selection among species is also likely to be caused by the  
714 various recombination rates across genomes [54, 71]. In particular, compared with *P.*  
715 *tremuloides*, the stronger signature of linked selection in *P. tremula* is supposed to be  
716 primarily driven by its lower average levels of recombination across the genome.  
717 More broadly, the different magnitude of linked selection may provide one of the  
718 major explanations for the disparate patterns of genomic variation across related  
719 species [73].

720 In addition to the association between recombination and neutral  
721 polymorphism, we find slightly negative correlations between recombination rate and  
722 the ratio of non-synonymous- to synonymous- polymorphism, but not divergence, in

723 *P. tremula* and *P. tremuloides* after controlling for the confounding variables. This  
 724 pattern indicates a potential reduced efficacy of purifying selection at eliminating  
 725 weakly deleterious non-synonymous mutations in low recombination regions [7, 48].  
 726 As a consequence, such Hill-Robertson interference (HRI) may help to understand  
 727 patterns of partially positive correlations between gene density and recombination rate  
 728 among all three species [13]. Given the relaxed efficacy of purifying selection in  
 729 regions of low recombination where weakly deleterious mutations are more likely to  
 730 accumulate at a high rate, important functional elements should thus not cluster in  
 731 these regions, as has already been shown in several other plant species [14, 15, 75]  
 732 Consistent with this prediction [76], we find positive association between gene  
 733 density and recombination rate in regions that experience low rates of recombination.  
 734 In high-recombination regions where selection is more effective at eliminating  
 735 slightly deleterious mutations, the association between gene density and  
 736 recombination become much weaker in all three species. However, it remains unclear  
 737 whether it is the effects of recombination gradients that drive the functional  
 738 organization of genomes in response to selection, or it is the gradients of functional  
 739 genomic elements that modify the evolution of recombination rates in *Populus*.

740 By examining the relationship of neutral polymorphism, recombination rate  
 741 and gene density, we find that levels of neutral polymorphism in genic regions are  
 742 primarily dominated by local rates of recombination, regardless of the density of  
 743 functional genes nearby. This suggests that widespread selection might have  
 744 uniformly shaped the patterns of neutral polymorphism in genic regions across the  
 745 genome, with variation of genetic diversity primarily relying on the variation of local  
 746 recombination rates [7, 49, 71]. However, there is a more complex pattern in  
 747 intergenic regions where levels of intergenic polymorphism are mainly dominated by

748 recombination rates in regions of lower gene density, while in regions of higher gene  
 749 density, levels of intergenic diversity are primarily shaped by the density of genes  
 750 nearby. Patterns of polymorphism vary, on both quantitative and qualitative scales,  
 751 between genic and intergenic sequences, with the latter exhibiting substantially higher  
 752 diversity, divergence and more non-uniformly distributed selective effects compared  
 753 with the former [54]. In addition, 84.2% of the intergenic sites included in this study  
 754 are located within 5-Kbp upstream/downstream regions of functional genes. This  
 755 suggests that many of these intergenic regions may have important functions in gene  
 756 regulation, in accordance with the widespread signatures of linked selection as we  
 757 found in these regions [77]. In these cases, we could argue that the differences in  
 758 neutral mutation rate alone are not sufficient to explain the distinct patterns of genetic  
 759 variation between genic and intergenic sites. Various rates, distributions, and selective  
 760 coefficients for either adaptive or deleterious mutations, however, may at least in part  
 761 drive the distinct patterns of polymorphism and divergence between these different  
 762 genomic environments.

763         In conclusion, we have examined and compared the relative roles of mutation,  
 764 population history, recombination and natural selection in forging the landscape  
 765 heterogeneity of genomic variation within and among three related *Populus* species.  
 766 We find substantially different magnitudes and signatures of linked selection among  
 767 species, with selection effects being strongest in *P. tremula* and weakest in *P.*  
 768 *trichocarpa*. Various effective population sizes and genome-wide recombination rates  
 769 are likely to be the primary factors causing the disparate genome-wide signatures of  
 770 linked selection among species. By analyzing the ratio of non-synonymous- to  
 771 synonymous- polymorphism along recombination gradients, we find that purifying  
 772 selection at purging slightly deleterious non-synonymous mutations is more effective



773 in regions experiencing high recombination. Such selective interaction between  
 774 recombination and selection may provide one of the explanations for the co-varying  
 775 patterns of gene density and recombination in the *Populus* species, where functional  
 776 genes are more likely to cluster in high-recombination regions. Finally, we find  
 777 distinct genomic signatures of selection between genic and intergenic regions. The  
 778 recombination rate-dependent effect of selection dominates levels of polymorphism at  
 779 genic sites, while patterns of linked selection at intergenic sites are shaped by  
 780 interactions between recombination and local gene density. Thus, our study provides a  
 781 promising avenue to dissect how interactions of various evolutionary forces are  
 782 driving the evolution of genomes for even closely related species.

783

## 784 **Materials and Methods**

785

### 786 **Samples and sequencing**

787 Leaf samples were separately collected from 24 genotypes of *P. tremula* and 24  
 788 genotypes of *P. tremuloides* (S1 Table). Genomic DNA was extracted from leaf  
 789 samples, and paired-end sequencing libraries with insert sizes of 650bp were  
 790 constructed for all genotypes. Whole-genome sequencing with a minimum expected  
 791 depth of  $20 \times$  was performed on the Illumina HiSeq 2000 platform, and  $2 \times 100$ -bp  
 792 paired-end reads were generated for all genotypes. As two samples of *P. tremuloides*  
 793 failed to obtain the expected coverage, all analyses are based on data from 24 *P.*  
 794 *tremula* genotypes and 22 *P. tremuloides* genotypes. All newly generated Illumina  
 795 reads from this study have been submitted to the Short Read Archive at NCBI under  
 796 accession IDs ranging from XXXXXX-XXXXXX. We obtained publicly available  
 797 short read Illumina data for 24 *P. trichocarpa* individuals from NCBI SRA (S1 Table).

798 Individuals were selected to have a similar read depth as the samples of the two aspen  
799 species. The accession numbers of *P. trichocarpa* samples can be found in [31]. These  
800 data are paired-end 100bp reads generated on the Illumina HiSeq2000 platform.

801

## 802 **Raw read filtering, read alignment and post-processing alignment**

803 Prior to read alignment, we used Trimmomatic [78] to remove adapter sequences  
804 from reads. Since the quality of reads always drops towards the end of reads, we used  
805 Trimmomatic to cut bases off the start and end of each read when the quality values  
806 dropped below 20. If the length of the processed reads was reduced to below 36 bases  
807 after trimming, reads were completely discarded. FastQC  
808 (<http://www.bioinformatics.babraham.ac.uk/projects/fastqc/>) was used to check and  
809 compare the per base sequence quality of the raw sequence data and the filtered data.  
810 After quality control, all paired-end and orphaned single-end reads of each sample  
811 were mapped to the *P. trichocarpa* version 3 (v3.0) genome [29] using the BWA-  
812 MEM algorithm with default parameters in bwa-0.7.10 [32].

813 Several post-processing steps of alignments were performed in order to  
814 minimize the number of artifacts in downstream analysis: First, indel realignment was  
815 performed as sequence reads are often mapped with mismatching bases in regions  
816 with insertions and deletions (indels). The RealignerTargetCreator in GATK (The  
817 Genome Analysis Toolkit) [79] was first used to find suspicious-looking intervals  
818 which were likely in need of realignment. Then, the IndelRealigner was used to run  
819 the realigner over those intervals. Second, as reads resulting from PCR duplicates can  
820 arise during the sequencing library preparation, we used the MarkDuplicates methods  
821 in the Picard package (<http://picard.sourceforge.net>) to remove those reads or read  
822 pairs having identical external coordinates and the same insert length. In such cases

only the single read with the highest summed base qualities was kept for downstream analysis. Third, in order to exclude genotyping errors caused by paralogous or repetitive DNA sequences where reads were poorly mapped to the reference genome, or by other genome feature differences between *P. trichocarpa* and *P. tremula* or *P. tremuloides*, we removed sites with extremely low or high read depths. After investigating the empirical distribution of read coverage, we filtered out sites with a total coverage less than 100X or greater than 1200X across all samples per species. When reads were mapped to multiple locations in the genome, they were randomly assigned to one location with a mapping score of zero by BWA-MEM. In order to account for such misalignment effects for each species, we removed those sites if there were more than 20 mapped reads with mapping score equal to zero across all individuals. Lastly, because the short read alignment is generally unreliable in highly repetitive genomic regions, we filtered out sites that overlapped with known repeat elements as identified by RepeatMasker [80]. In the end, the subset of sites that passed all these filtering criteria in the three *Populus* species were used in all following analyses.

839

# **SNP and genotype calling**

We implemented two complementary bioinformatics approaches in downstream analyses:

(i) Population genetic inferences that rely on the site frequency spectrum (SFS).

Recently, many studies pointed out the bias introduced in population genetic estimates by inaccurate genotype calls from NGS data [35, 81]. Either the single-sample genotype calling (calling genotypes for each individual separately and then merging them later) or the multi-sample genotype calling (jointly calling genotypes for all

individuals) can result in a bias in the estimation of SFS, as the former method usually leads to overestimation of rare variants, whereas the latter often leads to the opposite [35]. Therefore, all the population genetic statistics that based on the SFS in this study were estimated directly and jointly from filtered sites and individuals without calling genotypes, as implemented in the software package Analysis of Next-Generation Sequencing Data (ANGSD v0.602) [82].

(ii) Analyses based on accurate SNP and genotype calls. We performed SNP calling with HaplotypeCaller of the GATK v3.2.2 [79], which called SNPs and indels simultaneously via local re-assembly of haplotypes for each individual and created single-sample gVCFs. GenotypeGVCFs in GATK was then used to merge multi-sample records together, correct genotype likelihoods, and re-genotype the newly merged record and perform re-annotation. Several filtering steps were then used to reduce the number of false positive SNPs and retain high-quality SNPs: (1) we removed all SNPs that were overlapped with sites excluded by the previous filtering criteria. (2) only biallelic SNPs with a distance of more than 5bp away from indels were retained for further analysis. (3) Genotypes were accepted for each SNP and each individual only if the genotype quality score (GQ) was  $\geq 10$ , otherwise that specific genotype was treated as missing data. (4) SNPs with missing rate higher than 20% were removed from downstream analysis. (5) SNPs that showed significant deviation from Hardy-Weinberg Equilibrium ( $P < 0.001$ ) were removed from further downstream analysis.

## **Population structure**

We used only 4-fold synonymous SNPs with minor allele frequency  $> 0.1$  to perform population structure analyses with ADMIXTURE [34]. We ran ADMIXTURE

separately on all the sampled individuals among species and on the samples within each species, varying the number of genetic clusters  $K$  from 1 to 6. The most likely number of genetic cluster was selected by minimizing the cross-validation error in ADMIXTURE.

# **Diversity and divergence - related summary statistics**

For nucleotide diversity and divergence estimates, only the reads with mapping quality above 30 and the bases with quality score higher than 20 were used in all of the following analyses with ANGSD [82] and ngsTools [83]. To infer the global SFS, we firstly used the -doSaf implementation in ANGSD to calculate the site allele frequency likelihood based on the SAMTools genotype likelihood model [84]. Then, we used the -realSFS implementation in ANGSD to obtain an optimized folded global SFS using Expectation Maximization (EM) algorithm for each species. Based on the global SFS, we used the -doThetas function in ANGSD to estimate the per-site nucleotide diversity from posterior probability of allele frequency based on a maximum likelihood approach [36]. Two standard estimates of nucleotide diversity, the average pairwise nucleotide diversity ( $\Theta_{\pi}$ ) [38] and the proportion of segregating sites ( $\Theta_w$ ) [85], and one neutrality statistic test Tajima's  $D$  [38] were then summarized along all 19 chromosomes using non-overlapping sliding windows of 100 Kbp and 1 Mbp. Windows with less than 10% covered sites left after previous quality filtering steps were excluded. Accordingly, 3340 100-Kbp and 343 1-Mbp windows, with an average of 50,538 and 455,910 covered bases per window, were respectively included for downstream analyses. Based on posterior probabilities of sample allele frequencies at each site, we further used the ngsTools [83] to calculate pairwise

nucleotide divergence,  $d_{xy}$ , between pairs of species over all non-overlapping 100-Kbp and 1-Mbp windows.

All these statistics were also calculated for each type of functional element (0-fold non-synonymous, 4-fold synonymous, intron, 3' UTRs, 5' UTR, and intergenic sites) over the non-overlapping 100-Kbp and 1-Mbp windows in all three *Populus* species. The category of gene models we used followed the gene annotation of *P. trichocarpa* version 3.0 [29]. For protein-coding genes, we only included genes with at least 90% covered sites left from previous filtering steps to ensure that the three species have same gene structures. We also excluded genes overlapping with other genes. For the remaining genes, we selected the transcript with the highest content of protein-coding sites. For regions overlapped by different transcripts in each gene, we classified each site according to the following hierarchy (from highest to lowest): Coding regions (CDS), 3'UTR, 5'UTR, Intron. Thus, if a site resides in a 3'UTR in one transcript and CDS for another, the site was classified as CDS. In the end, a respective of 16.52, 3.4, 7.19, 4.02, 31.89, 73.46 megabases (Mbp) were partitioned into 0-fold non-synonymous (where all DNA sequence changes lead to protein sequence changes), 4-fold synonymous (where all DNA sequence changes lead to the same protein sequences), 3'UTR, 5'UTR, intron, and intergenic categories. Windows were not used if there were less than 100 sites left for any of the functional elements.

# **Linkage disequilibrium (LD) and population-scaled recombination rate ( $\rho$ )**

A total of 1,409,377 SNPs, 1,263,661 SNPs and 710,332 SNPs with minor allele frequency higher than 10% were used for the analysis of LD and  $\rho$  in *P. tremula*, *P. tremuloides* and *P. trichocarpa*, respectively. To estimate and compare the rate of LD decay in the three *Populus* species, we firstly used PLINK 1.9 [86] to randomly thin

the number of SNPs to 100,000 in each species. Then we calculated the squared correlation coefficients ( $r^2$ ) between all pairs of SNPs within 50 Kbp windows using PLINK 1.9. The decay of LD against physical distance was estimated using nonlinear regression of pairwise  $r^2$  vs. the physical distance between sites in base pairs [87]. Furthermore, we estimated the population-scaled recombination rate  $\rho$  using the Interval program of LDhat 2.2 [88] with 1,000,000 MCMC iterations sampling every 2,000 iterations and a block penalty parameter of five. The first 100,000 iterations of the MCMC iterations were discarded as a burn-in. We then calculated the scaled value of  $\rho$  in each 100-Kbp and 1-Mbp window as the average across SNPs in that window. In order to evaluate the extent of correlation between the estimated  $\rho$  and the pattern of LD, we also calculated the scaled  $r^2$  by averaging  $r^2$  over all pairwise SNPs in each 100 Kbp and 1 Mbp window. Only windows with more than 10,000 (in 100 Kbp windows) and 100,000 bases (in 1 Mbp windows) and 100 SNPs left after previous filtering steps were used for the estimation of  $\rho$  and  $r^2$ .

936

### 937 **Genomic correlates of diversity**

Within each non-overlapping 100 Kbp or 1 Mbp window, levels of neutral polymorphism in genic and intergenic regions were tabulated as the pairwise nucleotide diversity ( $\Theta_\pi$ ) at 4-fold synonymous and intergenic sites respectively. In order to examine the factors influencing levels of neutral polymorphism in all three *Populus* species, we further tabulated several genomic features within each window. First, we summarized population-scaled recombination rate ( $\rho$ ) as described above for each species. Second, we tabulated GC content as the fraction of bases where the reference sequence (*P. trichocarpa* v3.0) was a G or a C. Third, we measured the gene density as the number of functional genes within each window according to the

947 gene annotation of *P. trichocarpa* version 3.0. Fourth, we accounted for the variation  
 948 of mutation rate by calculating the number of fixed differences between aspen and *P.*  
 949 *trichocarpa* per neutral site (either 4-fold synonymous site or intergenic site) within  
 950 each window. The reason why we used divergence between aspen and *P. trichocarpa*  
 951 to measure mutation rate is because they are distantly related [26], and thus the  
 952 estimate of divergence are unlikely to be influenced by shared ancestral  
 953 polymorphisms between species. Fifth, we tabulated the number of covered bases in  
 954 each window as those met the filtering criteria described above.

955 We used Spearman's rank-order correlation tests to examine pairwise  
 956 correlations between the variables as described above. In order to account for the  
 957 autocorrelation between many of these variables, we calculated partial correlations  
 958 between the interested variables [89], which simultaneously remove the confounding  
 959 effects of other variables. All statistical tests were performed using R version 3.2.0  
 960 unless stated otherwise.

961

## 962 **Reference**

- 963 1. Nordborg M, Hu TT, Ishino Y, Jhaveri J, Toomajian C, Zheng H, et al. The  
 964 pattern of polymorphism in *Arabidopsis thaliana*. PLoS Biol. 2005;3:1289.
- 965 2. Begun DJ, Holloway AK, Stevens K, Hillier LW, Poh Y-P, Hahn MW, et al.  
 966 Population genomics: whole-genome analysis of polymorphism and divergence in  
 967 *Drosophila simulans*. PLoS Biol. 2007;5:e310.
- 968 3. Hellmann I, Prüfer K, Ji H, Zody MC, Pääbo S, Ptak SE. Why do human  
 969 diversity levels vary at a megabase scale? Genome Res. 2005;15:1222-1231.
- 970 4. Kimura M. The neutral theory of molecular evolution: Cambridge University  
 971 Press; 1984.



- 972 5. Li H, Durbin R. Inference of human population history from individual whole-  
973 genome sequences. *Nature*. 2011;475:493-496.
- 974 6. Mackay TF, Richards S, Stone EA, Barbadilla A, Ayroles JF, Zhu D, et al.  
975 The *Drosophila melanogaster* genetic reference panel. *Nature*. 2012;482:173-178.
- 976 7. Cutter AD, Choi JY. Natural selection shapes nucleotide polymorphism across  
977 the genome of the nematode *Caenorhabditis briggsae*. *Genome Res*. 2010;20:1103-  
978 1111.
- 979 8. Begun DJ, Aquadro CF. Levels of naturally occurring DNA polymorphism  
980 correlate with recombination rates in *D. melanogaster*. *Nature*. 1992;356:519 - 520.
- 981 9. McGaugh SE, Heil CS, Manzano-Winkler B, Loewe L, Goldstein S, Himmel  
982 TL, et al. Recombination modulates how selection affects linked sites in *Drosophila*.  
983 *PLoS Biol*. 2012;10:e1001422.
- 984 10. Kulathinal RJ, Bennett SM, Fitzpatrick CL, Noor MA. Fine-scale mapping of  
985 recombination rate in *Drosophila* refines its correlation to diversity and divergence.  
986 *Proc Natl Acad Sci U S A*. 2008;105:10051-10056.
- 987 11. Campos JL, Halligan DL, Haddrill PR, Charlesworth B. The relation between  
988 recombination rate and patterns of molecular evolution and variation in *Drosophila*  
989 *melanogaster*. *Mol Biol Evol*. 2014;31:1010-1028.
- 990 12. Charlesworth B, Campos JL. The relations between recombination rate and  
991 patterns of molecular variation and evolution in *Drosophila*. *Annu Rev Genet*.  
992 2014;48:383-403.
- 993 13. Gaut BS, Wright SI, Rizzon C, Dvorak J, Anderson LK. Recombination: an  
994 underappreciated factor in the evolution of plant genomes. *Nat Rev Genet*. 2007;8:77-  
995 84.

14. Flowers JM, Molina J, Rubinstein S, Huang P, Schaal BA, Purugganan MD. Natural selection in gene-dense regions shapes the genomic pattern of polymorphism in wild and domesticated rice. *Mol Biol Evol.* 2012;29:675-687.
15. Branca A, Paape TD, Zhou P, Briskine R, Farmer AD, Mudge J, et al. Whole-genome nucleotide diversity, recombination, and linkage disequilibrium in the model legume *Medicago truncatula*. *Proc Natl Acad Sci U S A.* 2011;108:E864-E870.
16. Luikart G, England PR, Tallmon D, Jordan S, Taberlet P. The power and promise of population genomics: from genotyping to genome typing. *Nat Rev Genet.* 2003;4:981-994.
17. Ellegren H. Genome sequencing and population genomics in non-model organisms. *Trends Ecol Evol.* 2014;29:51-63.
18. Lawrie DS, Petrov DA. Comparative population genomics: power and principles for the inference of functionality. *Trends Genet.* 2014;30:133-139.
19. Hufford MB, Xu X, Van Heerwaarden J, Pyhäjärvi T, Chia J-M, Cartwright RA, et al. Comparative population genomics of maize domestication and improvement. *Nature Genet.* 2012;44:808-811.
20. Locke DP, Hillier LW, Warren WC, Worley KC, Nazareth LV, Muzny DM, et al. Comparative and demographic analysis of orang-utan genomes. *Nature.* 2011;469:529-533.
21. Liu S, Lorenzen ED, Fumagalli M, Li B, Harris K, Xiong Z, et al. Population genomics reveal recent speciation and rapid evolutionary adaptation in polar bears. *Cell.* 2014;157:785-794.
22. Neale DB, Kremer A. Forest tree genomics: growing resources and applications. *Nat Rev Genet.* 2011;12:111-122.

- 1020 23. González - Martínez SC, Krutovsky KV, Neale DB. Forest - tree population  
1021 genomics and adaptive evolution. *New Phytol.* 2006;170:227-238.
- 1022 24. Eckenwalder JE. Systematics and evolution of *Populus*. In: Stettler RF,  
1023 Bradshaw HD, Heilman PE, Hinckley TM, editors. *Biology of Populus and its*  
1024 *Implications for Management and Conservation*. Ottawa: NRC Research Press;  
1025 1996.pp.7-32.
- 1026 25. Jansson S, Douglas CJ. *Populus*: a model system for plant biology. *Annu Rev*  
1027 *Plant Biol.* 2007;58:435-458.
- 1028 26. Wang Z, Du S, Dayanandan S, Wang D, Zeng Y, Zhang J. Phylogeny  
1029 Reconstruction and Hybrid Analysis of *Populus* (Salicaceae) Based on Nucleotide  
1030 Sequences of Multiple Single-Copy Nuclear Genes and Plastid Fragments. *Plos One*.  
1031 2014;9:e103645.
- 1032 27. Jansson S, Bhalerao RP, Groover AT. *Genetics and genomics of Populus*:  
1033 Springer; 2010.
- 1034 28. Dickmann DI, Kuzovkina J. Poplars and willows of the world, with emphasis  
1035 on silviculturally important species. In: Isebrands JG, Richardson J, editors. *Poplars*  
1036 *and Willows: trees for society and the environment*. Rome: The Food and Agriculture  
1037 Organization of the United Nations (FAO) and CAB International (CABI); 2014:8-91.
- 1038 29. Tuskan GA, Difazio S, Jansson S, Bohlmann J, Grigoriev I, Hellsten U, et al.  
1039 The genome of black cottonwood, *Populus trichocarpa* (Torr. & Gray). *Science*.  
1040 2006;313:1596-604.
- 1041 30. Hamzeh M, Dayanandan S. Phylogeny of *Populus* (Salicaceae) based on  
1042 nucleotide sequences of chloroplast trnT-trnF region and nuclear rDNA. *Am J Bot*.  
1043 2004;91:1398-408.

- 1044 31. Evans LM, Slavov GT, Rodgers-Melnick E, Martin J, Ranjan P, Muchero W,  
1045 et al. Population genomics of *Populus trichocarpa* identifies signatures of selection  
1046 and adaptive trait associations. *Nature Genet.* 2014;46:1089–1096.
- 1047 32. Li H. Aligning sequence reads, clone sequences and assembly contigs with  
1048 BWA-MEM; 2013. Preprint. Available: arXiv:13033997.
- 1049 33. Hall D, Luquez V, Garcia VM, St Onge KR, Jansson S, Ingvarsson PK.  
1050 Adaptive population differentiation in phenology across a latitudinal gradient in  
1051 European aspen (*Populus tremula*, L.): a comparison of neutral markers, candidate  
1052 genes and phenotypic traits. *Evolution.* 2007;61:2849-2860.
- 1053 34. Alexander DH, Novembre J, Lange K. Fast model-based estimation of  
1054 ancestry in unrelated individuals. *Genome Res.* 2009;19:1655-1664.
- 1055 35. Nielsen R, Korneliussen T, Albrechtsen A, Li Y, Wang J. SNP calling,  
1056 genotype calling, and sample allele frequency estimation from New-Generation  
1057 Sequencing data. *PLoS One.* 2011;7:e37558.
- 1058 36. Kim SY, Lohmueller KE, Albrechtsen A, Li Y, Korneliussen T, Tian G, et al.  
1059 Estimation of allele frequency and association mapping using next-generation  
1060 sequencing data. *BMC bioinformatics.* 2011;12:231.
- 1061 37. Ismail M, Soolanayakanahally RY, Ingvarsson PK, Guy RD, Jansson S, Silim  
1062 SN, et al. Comparative nucleotide diversity across North American and European  
1063 *Populus* species. *J Mol Evol.* 2012;74:257-272.
- 1064 38. Tajima F. Statistical method for testing the neutral mutation hypothesis by  
1065 DNA polymorphism. *Genetics.* 1989;123:585-595.
- 1066 39. Zhou L, Bawa R, Holliday J. Exome resequencing reveals signatures of  
1067 demographic and adaptive processes across the genome and range of black  
1068 cottonwood (*Populus trichocarpa*). *Mol Ecol.* 2014;23:2486-2499.

- 1069 40. Chikhi L, Sousa VC, Luisi P, Goossens B, Beaumont MA. The confounding  
1070 effects of population structure, genetic diversity and the sampling scheme on the  
1071 detection and quantification of population size changes. *Genetics*. 2010;186:983-995.
- 1072 41. Huang DI, Hefer CA, Kolosova N, Douglas CJ, Cronk QC. Whole plastome  
1073 sequencing reveals deep plastid divergence and cytonuclear discordance between  
1074 closely related balsam poplars, *Populus balsamifera* and *P. trichocarpa* (Salicaceae).  
1075 *New Phytol*. 2014;204:693-703.
- 1076 42. Wang J, Scofield D, Street NR, Ingvarsson PK. Variant calling using NGS  
1077 data in European aspen (*Populus tremula*). In: Sablok G, Kumar S, Ueno S, Kuo J,  
1078 Varotto C, editors. *Advances in the Understanding of Biological Sciences Using Next*  
1079 *Generation Sequencing (NGS) Approaches*. Springer; 2015. pp.43-61.
- 1080 43. Begun DJ. Population genetics of silent and replacement variation in  
1081 *Drosophila simulans* and *D. melanogaster*: X/autosome differences? *Mol Biol Evol*.  
1082 1996;13:1405-1407.
- 1083 44. Ingvarsson PK. Multilocus patterns of nucleotide polymorphism and the  
1084 demographic history of *Populus tremula*. *Genetics*. 2008;180:329-340.
- 1085 45. Slavov GT, DiFazio SP, Martin J, Schackwitz W, Muchero W, Rodgers -  
1086 Melnick E, et al. Genome resequencing reveals multiscale geographic structure and  
1087 extensive linkage disequilibrium in the forest tree *Populus trichocarpa*. *New Phytol*.  
1088 2012;196:713-725.
- 1089 46. Comeron JM, Kreitman M. The correlation between synonymous and  
1090 nonsynonymous substitutions in *Drosophila*: mutation, selection or relaxed  
1091 constraints? *Genetics*. 1998;150:767-775.

- 1092 47. Hellmann I, Ebersberger I, Ptak SE, Pääbo S, Przeworski M. A neutral  
1093 explanation for the correlation of diversity with recombination rates in humans. *Am J*  
1094 *Hum Genet.* 2003;72:1527-1735.
- 1095 48. Hill WG, Robertson A. The effect of linkage on limits to artificial selection.  
1096 *Genetical Res.* 1966;8:269-294.
- 1097 49. Cutter AD, Payseur BA. Selection at linked sites in the partial selfer  
1098 *Caenorhabditis elegans*. *Mol Biol Evol.* 2003;20:665-673.
- 1099 50. Payseur BA, Nachman MW. Gene density and human nucleotide  
1100 polymorphism. *Mol Biol Evol.* 2002;19:336-340.
- 1101 51. Andolfatto P. Hitchhiking effects of recurrent beneficial amino acid  
1102 substitutions in the *Drosophila melanogaster* genome. *Genome Res.* 2007;17:1755-  
1103 1762.
- 1104 52. Macpherson JM, Sella G, Davis JC, Petrov DA. Genomewide spatial  
1105 correspondence between nonsynonymous divergence and neutral polymorphism  
1106 reveals extensive adaptation in *Drosophila*. *Genetics.* 2007;177:2083-2099.
- 1107 53. Ingvarsson PK. Natural selection on synonymous and nonsynonymous  
1108 mutations shapes patterns of polymorphism in *Populus tremula*. *Mol Biol Evol.*  
1109 2010;27:650-660.
- 1110 54. Cutter AD, Payseur BA. Genomic signatures of selection at linked sites:  
1111 unifying the disparity among species. *Nat Rev Genet.* 2013;14:262-274.
- 1112 55. Hudson RR, Kreitman M, Aguadé M. A test of neutral molecular evolution  
1113 based on nucleotide data. *Genetics.* 1987;116:153-159.
- 1114 56. Charlesworth B, Morgan M, Charlesworth D. The effect of deleterious  
1115 mutations on neutral molecular variation. *Genetics.* 1993;134:1289-1303.

- 1116 57. Yang S, Wang L, Huang J, Zhang X, Yuan Y, Chen J-Q, et al. Parent-progeny  
1117 sequencing indicates higher mutation rates in heterozygotes. *Nature*. 2015;523:463-  
1118 467.
- 1119 58. Callahan CM, Rowe CA, Ryel RJ, Shaw JD, Madritch MD, Mock KE.  
1120 Continental - scale assessment of genetic diversity and population structure in  
1121 quaking aspen (*Populus tremuloides*). *J Biogeogr*. 2013;40:1780-1791.
- 1122 59. Städler T, Haubold B, Merino C, Stephan W, Pfaffelhuber P. The impact of  
1123 sampling schemes on the site frequency spectrum in nonequilibrium subdivided  
1124 populations. *Genetics*. 2009;182:205-216.
- 1125 60. Lexer C, Fay M, Joseph J, Nica MS, Heinze B. Barrier to gene flow between  
1126 two ecologically divergent *Populus* species, *P. alba* (white poplar) and *P. tremula*  
1127 (European aspen): the role of ecology and life history in gene introgression. *Mol Ecol*.  
1128 2005;14:1045-1057.
- 1129 61. Pregitzer KS, Barnes BV. Flowering phenology of *Populus tremuloides* and *P.*  
1130 *grandidentata* and the potential for hybridization. *Can J Forest Res*. 1980;10:218-223.
- 1131 62. Kim S, Plagnol V, Hu TT, Toomajian C, Clark RM, Ossowski S, et al.  
1132 Recombination and linkage disequilibrium in *Arabidopsis thaliana*. *Nature Genet*.  
1133 2007;39:1151-1155.
- 1134 63. Neale DB, Ingvarsson PK. Population, quantitative and comparative genomics  
1135 of adaptation in forest trees. *Curr Opin Plant Biol*. 2008;11:149-155.
- 1136 64. Smukowski C, Noor M. Recombination rate variation in closely related  
1137 species. *Heredity*. 2011;107:496-508.
- 1138 65. Hellsten U, Wright KM, Jenkins J, Shu S, Yuan Y, Wessler SR, et al. Fine-  
1139 scale variation in meiotic recombination in *Mimulus* inferred from population shotgun  
1140 sequencing. *Proc Natl Acad Sci U S A*. 2013;110:19478-19482.

1141 66. Silva - Junior OB, Grattapaglia D. Genome-wide patterns of recombination,  
1142 linkage disequilibrium and nucleotide diversity from pooled resequencing and single  
1143 nucleotide polymorphism genotyping unlock the evolutionary history of *Eucalyptus*  
1144 *grandis*. New Phytol. 2015; doi: 10.1111/nph.13505.

1145 67. Tenesa A, Navarro P, Hayes BJ, Duffy DL, Clarke GM, Goddard ME, et al.  
1146 Recent human effective population size estimated from linkage disequilibrium.  
1147 Genome Res. 2007;17:520-526.

1148 68. Cutter AD, Jovelín R, Dey A. Molecular hyperdiversity and evolution in very  
1149 large populations. Mol Ecol. 2013;22:2074-2095.

1150 69. Larracuente AM, Sackton TB, Greenberg AJ, Wong A, Singh ND, Sturgill D,  
1151 et al. Evolution of protein-coding genes in *Drosophila*. Trends Genet. 2008;24:114-  
1152 123.

1153 70. Andolfatto P. Adaptive evolution of non-coding DNA in *Drosophila*. Nature.  
1154 2005;437:1149-1152.

1155 71. Slotte T. The impact of linked selection on plant genomic variation. Brief  
1156 Funct Genomics. 2014;13:268-275.

1157 72. Hahn MW. Toward a selection theory of molecular evolution. Evolution.  
1158 2008;62:255-265.

1159 73. Corbett-Detig RB, Hartl DL, Sackton TB. Natural selection constrains neutral  
1160 diversity across a wide range of species. PLoS Biol. 2015;13:e1002112.

1161 74. Leffler EM, Bullaughey K, Matute DR, Meyer WK, Segurel L, Venkat A, et  
1162 al. Revisiting an old riddle: what determines genetic diversity levels within species.  
1163 PLoS Biol. 2012;10:e1001388.



- 1164 75. Anderson LK, Lai A, Stack SM, Rizzon C, Gaut BS. Uneven distribution of  
1165 expressed sequence tag loci on maize pachytene chromosomes. *Genome Res.*  
1166 2006;16:115-122.
- 1167 76. Haddrill PR, Halligan DL, Tomaras D, Charlesworth B. Reduced efficacy of  
1168 selection in regions of the *Drosophila* genome that lack crossing over. *Genome Biol.*  
1169 2007;8:R18.
- 1170 77. Haygood R, Fedrigo O, Hanson B, Yokoyama K-D, Wray GA. Promoter  
1171 regions of many neural-and nutrition-related genes have experienced positive  
1172 selection during human evolution. *Nature Genet.* 2007;39:1140-1144.
- 1173 78. Lohse M, Bolger A, Nagel A, Fernie AR, Lunn JE, Stitt M, et al. RobiNA: a  
1174 user-friendly, integrated software solution for RNA-Seq-based transcriptomics.  
1175 *Nucleic Acids Res.* 2012;40:W622-W627.
- 1176 79. DePristo MA, Banks E, Poplin R, Garimella KV, Maguire JR, Hartl C, et al. A  
1177 framework for variation discovery and genotyping using next-generation DNA  
1178 sequencing data. *Nature Genet.* 2011;43:491-498.
- 1179 80. Tarailo - Graovac M, Chen N. Using RepeatMasker to identify repetitive  
1180 elements in genomic sequences. *Curr Protoc in Bioinformatics.* 2009; 25:4.10.1-  
1181 4.10.14.
- 1182 81. Nevado B, Ramos-Onsins S, Perez-Enciso M. Resequencing studies of  
1183 nonmodel organisms using closely related reference genomes: optimal experimental  
1184 designs and bioinformatics approaches for population genomics. *Mol Ecol.*  
1185 2014;23:1764-1779.
- 1186 82. Korneliussen TS, Albrechtsen A, Nielsen R. ANGSD: analysis of next  
1187 generation sequencing data. *BMC bioinformatics.* 2014;15:356.

1188 83. Fumagalli M, Vieira FG, Linderroth T, Nielsen R. ngsTools: methods for  
1189 population genetics analyses from next-generation sequencing data. *Bioinformatics*.  
1190 2014;30:1486-1487.

1191 84. Li H, Handsaker B, Wysoker A, Fennell T, Ruan J, Homer N, et al. The  
1192 sequence alignment/map format and SAMtools. *Bioinformatics*. 2009;25:2078-2079.

1193 85. Watterson G. On the number of segregating sites in genetical models without  
1194 recombination. *Theor Pop Biol*. 1975;7:256-276.

1195 86. Purcell S, Neale B, Todd-Brown K, Thomas L, Ferreira MA, Bender D, et al.  
1196 PLINK: a tool set for whole-genome association and population-based linkage  
1197 analyses. *Am J Hum Genet*. 2007;81:559-575.

1198 87. Remington DL, Thornsberry JM, Matsuoka Y, Wilson LM, Whitt SR,  
1199 Doebley J, et al. Structure of linkage disequilibrium and phenotypic associations in  
1200 the maize genome. *Proc Natl Acad Sci U S A*. 2001;98:11479-11484.

1201 88. McVean GA, Myers SR, Hunt S, Deloukas P, Bentley DR, Donnelly P. The  
1202 fine-scale structure of recombination rate variation in the human genome. *Science*.  
1203 2004;304:581-584.

1204 89. Kim S-H, Soojin VY. Understanding relationship between sequence and  
1205 functional evolution in yeast proteins. *Genetica*. 2007;131:151-156.

1206

1207

1208

1209

1210

1211

1212

# 1213    **Supporting Information**

1214

1215    **S1 Fig. Sampling localities (details in S1 Table, black star symbols) and**  
 1216    **distributions of *P. tremula* (orange areas), *P. tremuloides* (blue areas) and *P.***  
 1217    ***trichocarpa* (green areas).**

1218

1219    **S2 Fig. Comparison of per-base sequence quality between raw and filtered**  
 1220    **sequence data.** Per-base sequence quality comparison between raw paired-end  
 1221    sequence data (forward reads: top left and reverse reads: top right), and filtered  
 1222    sequence data with both forward (bottom left) and reverse (bottom middle) reads left  
 1223    or only single-end (bottom right) reads left. The x-axis of the BoxWhisker plot shows  
 1224    the position in read, and the y-axis shows the quality scores. The higher the score the  
 1225    better the base call. The background of the plot divides the y axis into very good  
 1226    quality calls (green), calls of reasonable quality (orange), and calls of poor quality  
 1227    (red). The central red line is the median quality value, the yellow box represents the  
 1228    inter-quartile of quality, the upper and lower whiskers represent the 10% and 90%  
 1229    points, the blue line represents the mean quality. (a) Sample SwAsp009 of *Populus*  
 1230    *tremula*. (b) Sample Alb16-1 of *P. tremuloides*. (c) Sample GW-9772 (accession  
 1231    number in SRA: SRR1571518) of *P. trichocarpa*.

1232

1233    **S3 Fig. Population structure within and between species.** (a) Genetic structure of  
 1234    three *Populus* inferred using ADMIXTURE when it identifies three genetic clusters in  
 1235    the dataset. (b) The cross-validation error when *K* varies from 1 to 6 across the three  
 1236    species. (c,d,e) The cross-validation error when *K* varies from 1 to 6 separately in  
 1237    samples of *P. tremula*, *P. tremuloides*, *P. trichocarpa*.

1238

1239 **S4 Fig. Genome-wide patterns of divergence among three *Populus* species.** Mean  
1240 pairwise divergence ( $d_{xy}$ ) between pairs of three *Populus* species was calculated over  
1241 100 Kbp non-overlapping windows along the 19 chromosomes. *P. tremula*-  
1242 *P.tremuloies*: red, *P. tremula*-*P. trichocarpa*: light purple, *P. tremuloides*-  
1243 *P.trichocarpa*: purple.

1244

1245 **S5 Fig. Correlations of divergence between independent pairs of the three**  
1246 ***Populus* species.** Spearman's correlations of pairwise nucleotide divergence ( $d_{xy}$ )  
1247 between  $d_{xy}(P. tremula-P. trichocarpa)$  and  $d_{xy}(P. tremuloides-P. trichocarpa)$  (a); between  $d_{xy}(P. tremula-P.$   
1248  $tremuloides)$  and  $d_{xy}(P. tremula-P. trichocarpa)$  (b); and between  $d_{xy}(P. tremula-P. tremuloides)$  and  $d_{xy}(P.$   
1249  $tremuloides-P. trichocarpa)$  (c). All datasets are based on 100 Kbp non-overlapping windows  
1250 across the genome.

1251

1252 **S6 Fig. The distributions of estimates of (a) pairwise sequence diversity ( $\Theta_{\pi}$ ), (b)**  
1253 **the number of segregating sites ( $\Theta_w$ ), (c) Tajima's D and (d) population-scaled**  
1254 **recombination rate ( $\rho$ ) over 1Mbp non-overlapping windows in *P. tremula***  
1255 **(orange), *P. tremuloides* (blue) and *P. trichocarpa* (green).**

1256

1257 **S7 Fig. Estimates of (a) pairwise sequence diversity ( $\Theta_{\pi}$ ) and (b) Tajima's D in**  
1258 **samples of Alberta (light blue), Wisconsin (light green) and all samples of *P.***  
1259 ***tremuloides* (blue) over 100 Kbp non-overlapping windows.**

1260

1261 **S8 Fig. Number of singletons in samples of (a) *P. tremula*, (b) *P. tremuloides*, and**  
1262 **(c) *P. trichocarpa*.**

1263

1264 **S9 Fig. The distributions of estimates of pairwise sequence diversity ( $\Theta_{\Pi}$ ) in *P.***  
 1265 *tremula* (orange), *P. tremuloides* (blue) and *P. trichocarpa* (green) over 1 Mbp

1266

1267 **non-overlapping windows in different site categories.**

1268 **S10 Fig. The distributions of estimates of Tajima's D in *P. tremula* (orange), *P.***  
 1269 *tremuloides* (blue) and *P. trichocarpa* (green) over 1 Mbp non-overlapping

1270

1271 **windows in different site categories.**

1272 **S11 Fig. The distributions of estimates of nucleotide divergence ( $d_{xy}$ ) between**  
 1273 **pairs of the three *Populus* species over 1 Mbp non-overlapping windows in**

1274

1275 **different site categories.**

1276 **S12 Fig. Relationship between population-scaled recombination rate and linkage**  
 1277 **disequilibrium.** Scatter plots display correlations between population-scaled

1278

1279 population rates ( $\rho$ ) and linkage disequilibrium ( $r^2$ ) over 100 Kbp non-overlapping

1280 windows in (a) *P. tremula*, (b) *P. tremuloides*, and (c) *P. trichocarpa*. The red to

1281

1282 yellow to blue gradient indicates decreased density of observed events at a give

1283

1284 **S13 Fig. Distributions of the ratio of population-scaled recombination rate to**  
 1285 **nucleotide diversity ( $\rho/\theta_w$ ) over 100 Kbp non-overlapping windows in *P. tremula***  
 1286 **(orange line), *P. tremuloides* (blue line) and *P. trichocarpa* (green line).**

1287 **S14 Fig. Correlations between estimates of intergenic genetic diversity ( $\Theta_{\text{Intergenic}}$ )**  
 1288 **(left panel) and divergence ( $d_{\text{Intergenic}}$ ) (right panel) with population-scaled**  
 1289 **recombination rate ( $\rho$ ) over 1 Mbp non-overlapping windows. Linear regression**  
 1290 **lines are colored according to species: (a) *P. tremula* (orange line), (b) *P. tremuloides***  
 1291 **(blue line) and (c) *P. trichocarpa* (green line).**

1292

1293 **S15 Fig. Relationship between gene number and the proportion of coding bases**  
 1294 **within 1 Mbp non-overlapping windows.**

1295

1296 **S16 Fig. Correlations between estimates of genic and intergenic genetic**  
 1297 **divergence with gene density over 1 Mbp non-overlapping windows. Correlations**  
 1298 **between estimates of genetic divergence at 4-fold synonymous sites ( $d_{4\text{-fold}}$ ) (left**  
 1299 **panel) and intergenic sites ( $d_{\text{Intergenic}}$ ) (right panel) with gene density over 1Mbp non-**  
 1300 **overlapping windows. Linear regression lines are colored according to species: (a) *P.***  
 1301 ***tremula* (orange line), (b) *P. tremuloides* (blue line) and (c) *P. trichocarpa* (green**  
 1302 **line).**

1303

1304 **S1 Table. Samples used in this study.**

1305

1306 **S2 Table. Summary statistics of Illumina re-sequencing data per sample.**

1307

1308 **S3 Table. Pairwise divergence ( $d_{xy}$ ) (median and central 95% range) between *P.***  
 1309 ***tremula*, *P. tremuloides* and *P. trichocarpa* for various genomic contexts over 100**  
 1310 **Kbp non-overlapping windows across genomes.**

1311

1312 **S4 Table. Summary of the correlation coefficients (Spearman's  $\rho$ ) between levels**  
 1313 **of synonymous diversity and non-synonymous divergence.**

$\theta_\pi$ 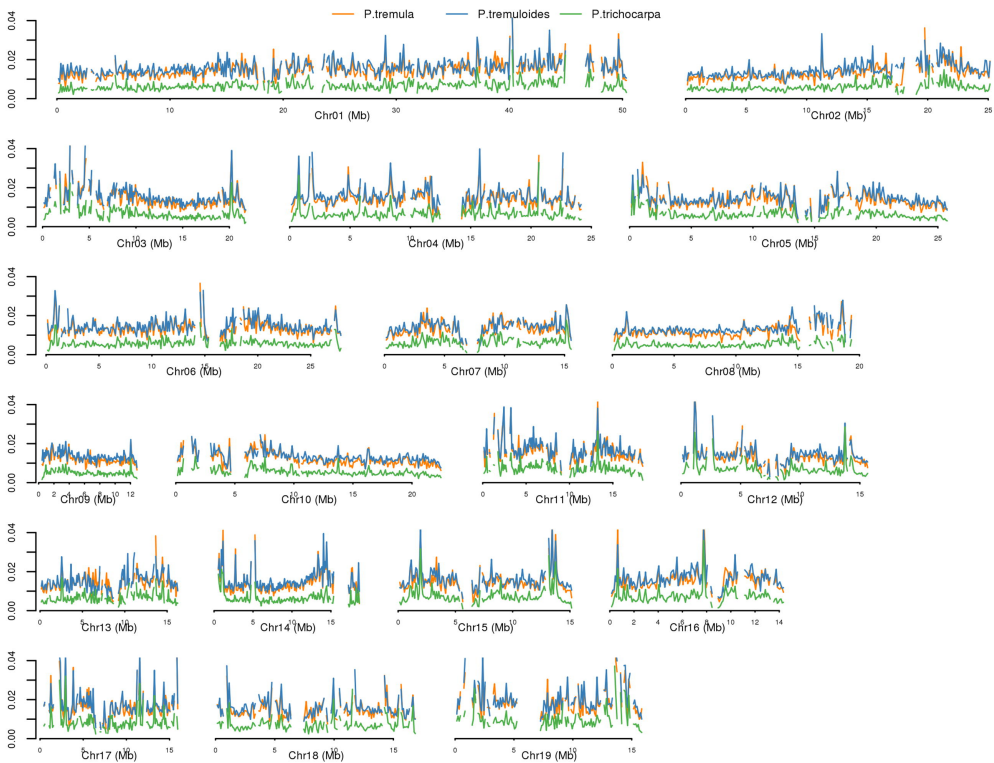



**(a)**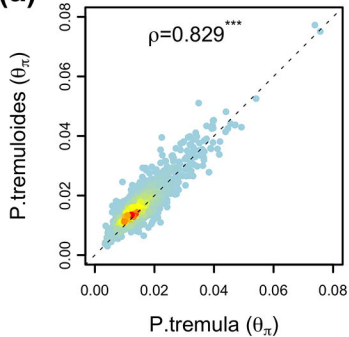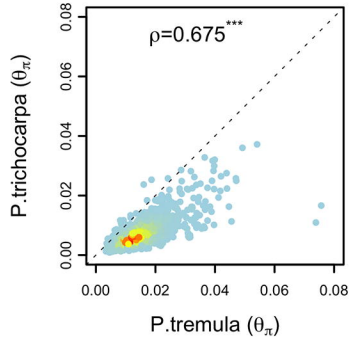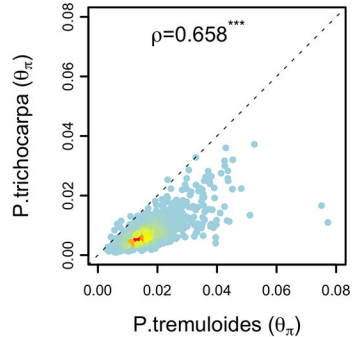**(b)**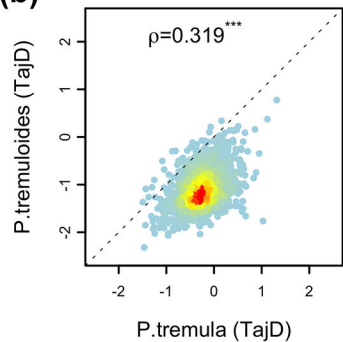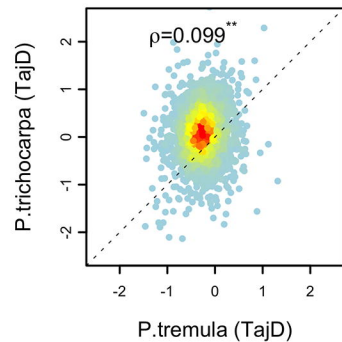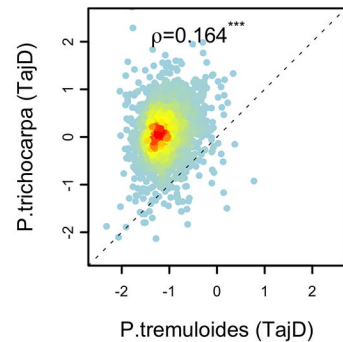**(c)**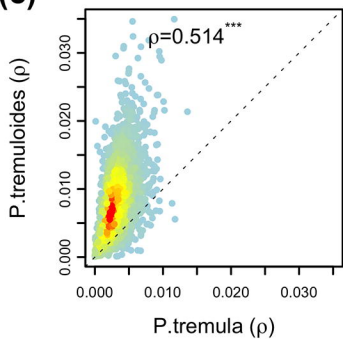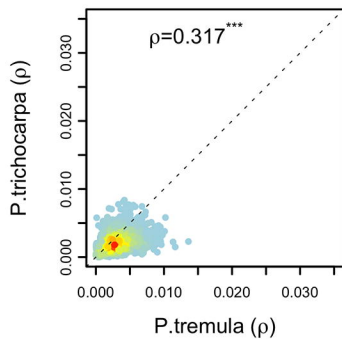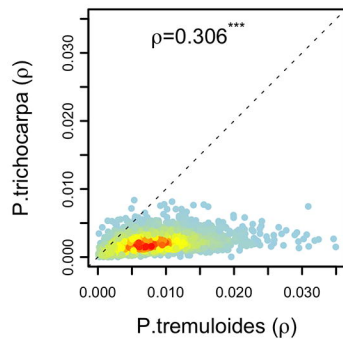

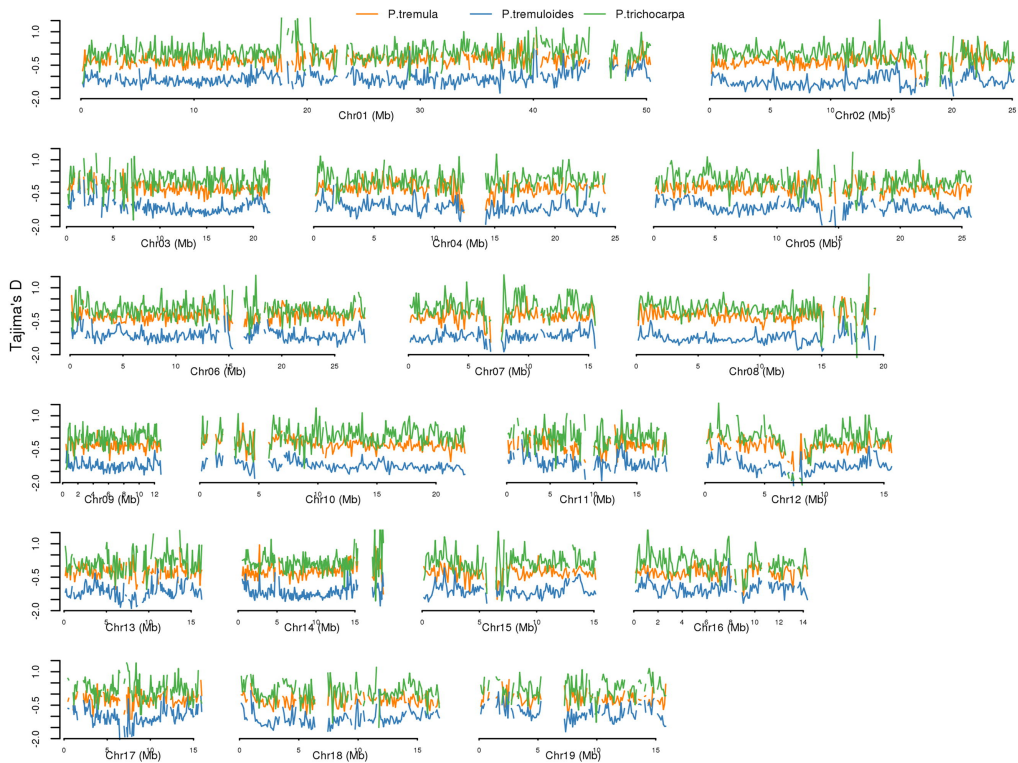

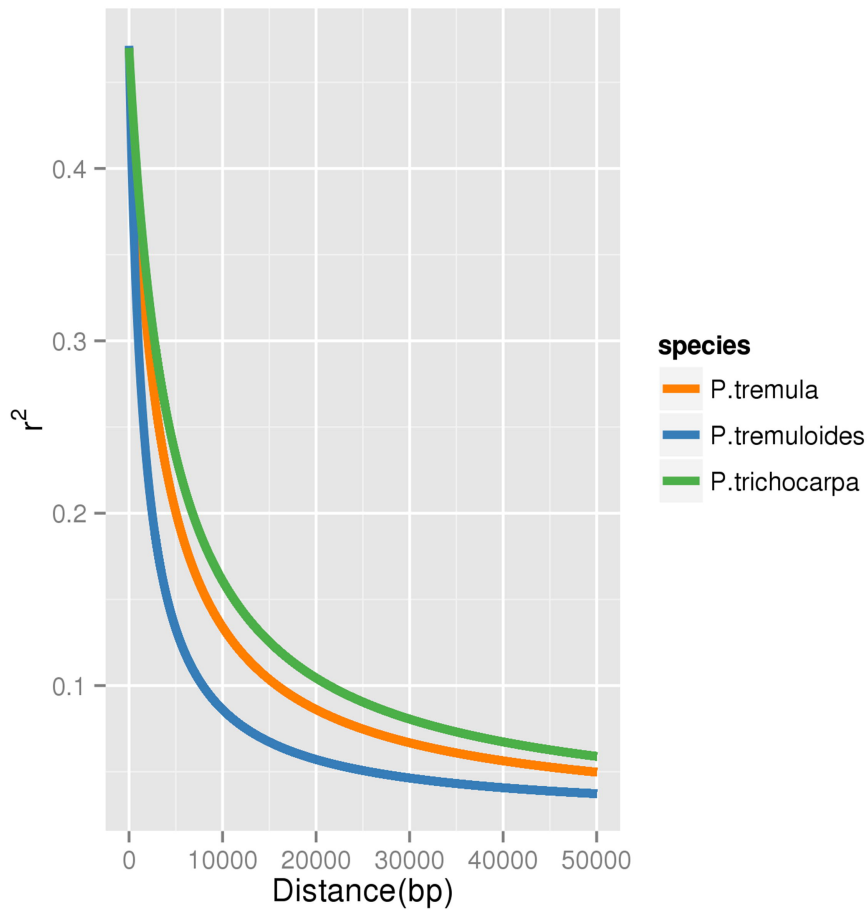

$\rho$

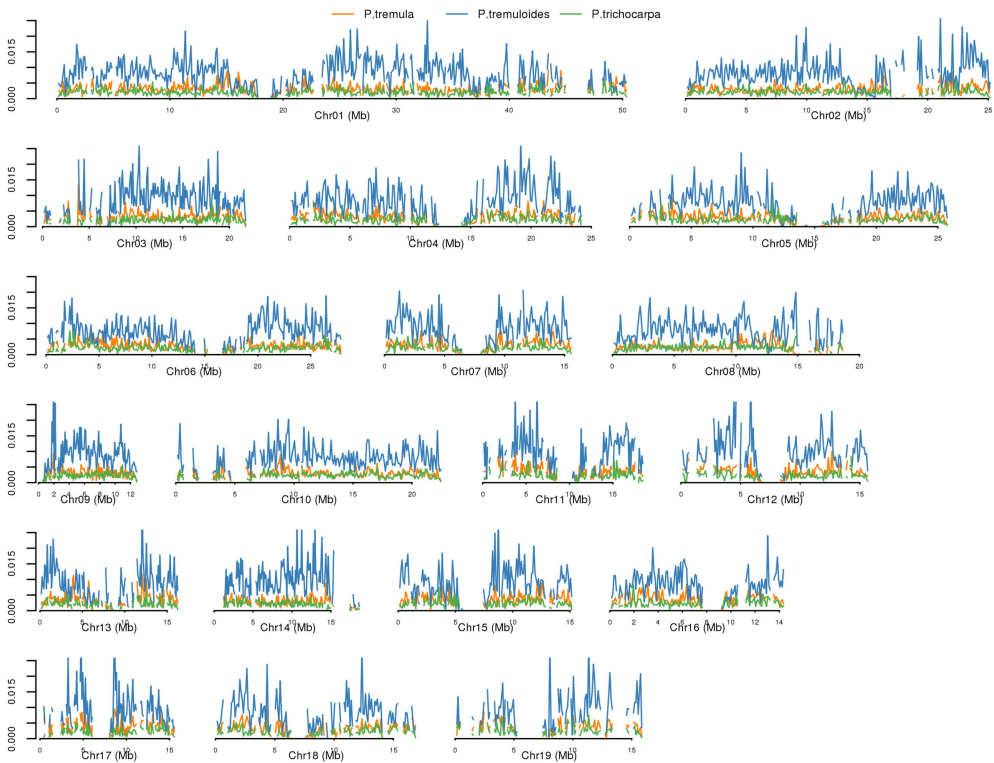

(a)

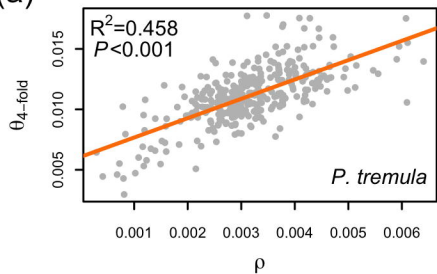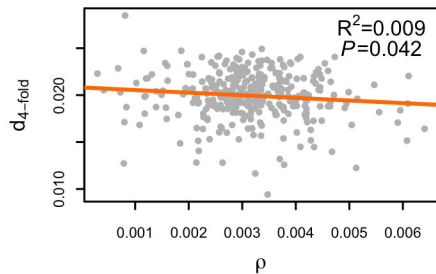

(b)

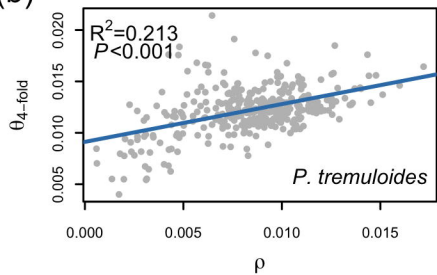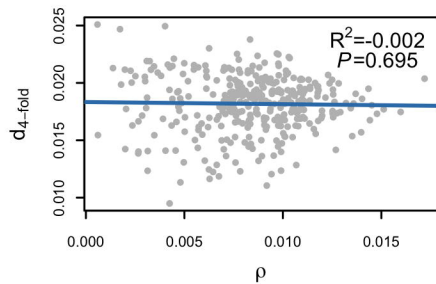

(c)

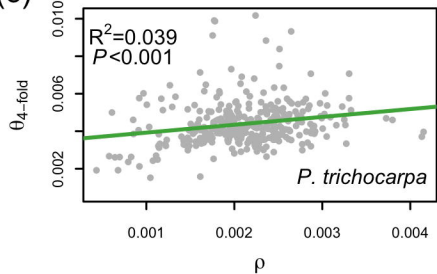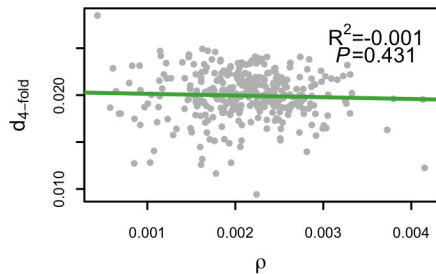

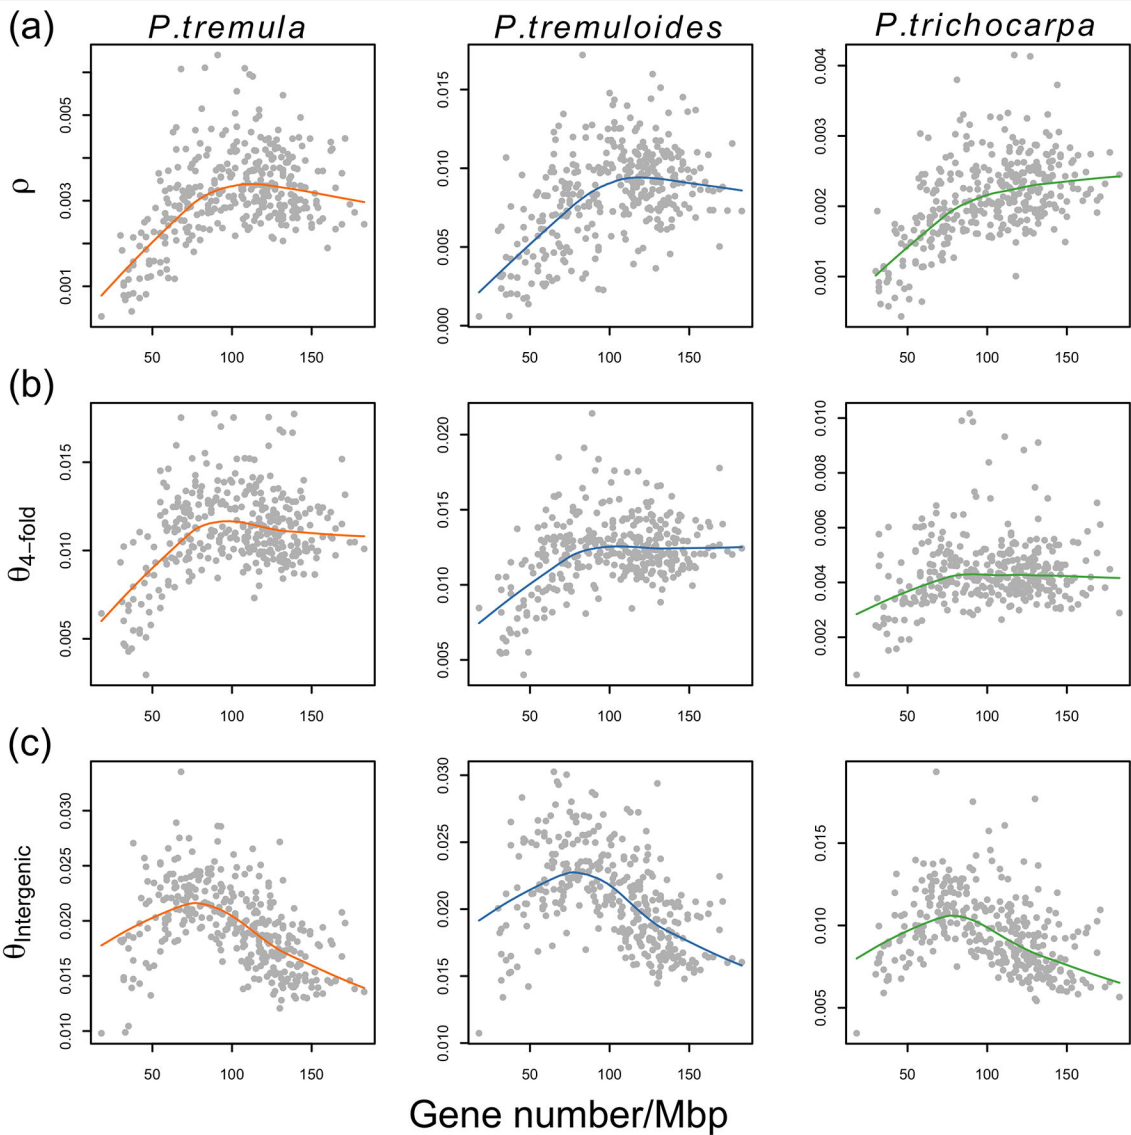

Source: http://biorxiv.org/content/10.1101/026344v1.full.pdf
